# Supplementary material for: RhCl(PPh3)3-mediated C–H oxyfunctionalization of pyrrolido-functionalized bisazoaromatic pincers: a combined experimental and theoretical scrutiny of redox-active and spectroscopic properties
Source: Royal Society of Chemistry journal article supplement (doi:10.1039/c5dt05044h), 2016-01-01
Supplement: c5dt05044h1.pdf [file c5dt05044h1.pdf]

*Electronic Supplementary Information*  
(34pages)

**RhCl(PPh<sub>3</sub>)<sub>3</sub>-mediated C–H oxyfunctionalization of pyrrolido-functionalized bisazoaromatic pincer: a combined experimental and theoretical scrutiny of redox-active and spectroscopic properties†**

Tapas Ghorui, Sima Roy, Shuvam Pramanik and Kausikisankar Pramanik\*

Department of Chemistry, Inorganic Chemistry Section, Jadavpur University, Kolkata – 700032, India.

E-mail: kpramanik@hotmail.com; Tel: +91 94333 66013

## Experimental section

### Physical measurements

The elemental analyses (C, H, N) were performed with a Perkin- Elmer model 2400 series II elemental analyzer. FT-IR spectra were recorded on Perkin-Elmer L1600300 spectrometer.  $^1\text{H}$  and  $^{13}\text{C}$  NMR spectral measurement was carried out on Bruker FT 300 MHz spectrometers with TMS as an internal reference.  $^{31}\text{P}$  NMR spectra were obtained using a Bruker Avance 500 MHz spectrometer operating at 202.45 MHz. The electrospray ionization mass spectra (ESI-MS positive) were measured in acetonitrile HRMS spectrometers (Model: QTOF Micro YA263). The electronic spectra in dichloromethane solution were obtained using a Perkin-Elmer LAMDA 25 spectrophotometer with a solute concentration of about  $10^{-5}$  M. Electrochemical measurements were carried out at  $27^\circ\text{C}$  with VersaStat II Princeton Applied Research potentiostat/galvanostat under argon atmosphere. The cell contained a Pt working electrode and a Pt wire auxiliary electrode. Tetraethylammonium perchlorate ( $\text{NEt}_4\text{ClO}_4$ ) was used as a supporting electrolyte and the potentials are referenced to the Ag/AgCl electrode without junction correction.

### Crystallographic studies

Crystals of **1** suitable for diffraction analysis was grown by slow evaporation of acetonitrile solution at room temperature. The dark green complex crystallizes in monoclinic  $P2_1/c$  space group. X-ray intensity data for compound **1** was measured at 130(2) K on Bruker AXS SMART APEX II equipped with a CCD diffractometer using graphite-monochromator ( $\text{Mo K}\alpha$ ,  $\lambda = 0.71073 \text{ \AA}$ ). Metal atoms were located by direct methods, and the rest of the non-hydrogen atoms emerged from successive Fourier synthesis. The structures were refined by full-matrix least squares procedures on  $F^2$ .<sup>1</sup> All the H atoms were included in calculated positions and treated as riding atoms using SHELXL default parameters,  $\text{Uiso}(\text{H}) = 1.2\text{Ueq}(\text{C})$ . Calculations were performed using the SHELXTL v 6.14 program package.<sup>2</sup> Empirical absorption correction was applied using SADABS.<sup>3</sup> The phenyl ring (C69 to C74) connected with P3 shows the rotational disorder (Fig. S5) and refined *via* PART command along with SADI and DFIX instructions. The anisotropic displacement parameter of the carbon atoms in each ring part (either A or B) has been refined *via* EADP command. The asymmetric unit contains two rhodium complexes associated with the three acetonitrile solvent molecules. Out of them two acetonitrile molecules have been removed by using PLATON (2013) SQUEEZE Program<sup>4</sup> because of their large ADP and short intermolecular separation. Thermal ellipsoids are drawn at the 50% probability level. Molecular structure plots were drawn using the Oak Ridge thermal ellipsoid plot ORTEP.<sup>5</sup>

## Computational details

The molecular geometry of the singlet ground state ( $S_0$ ) of **1**, **2a** and **2b** has been calculated in gas phase in their singlet spin state without any ligand simplification by DFT method using the (R)B3LYP<sup>6</sup> hybrid functional approach incorporated in GAUSSIAN 09 program package.<sup>7</sup> The geometries of the complexes were fully optimized in gas phase without imposing any symmetry constraints. The nature of all the stationary points was checked by computing vibration frequencies, and all the species were found to be true potential energy minima, as no imaginary frequency were obtained (NImag = 0). The single crystal X-ray coordinates have been used as the initial input in all calculations. To get an insight into the ground state geometry, electronic structure and nature of FMOs of the one-electron oxidized radical cation species, **1**<sup>•+</sup> and **2a**<sup>•+</sup> were optimized by assuming an  $S = 1/2$  spin state at the (U)B3LYP level. On the basis of the optimized geometries, the absorption and emission spectra properties in dichloromethane ( $\text{CH}_2\text{Cl}_2$ ) media were calculated by the time-dependent density functional theory (TD-DFT)<sup>8</sup> approach associated with the conductor-like polarizable continuum model (CPCM).<sup>9</sup> We computed the lowest 100 singlet–singlet transitions in absorption processes. The electronic structure contributions to the differences in observed optoelectronic properties are compared by natural transition orbital (NTO) analysis. This method offers the most compact representation of the transition density between the ground and excited states in terms of an expansion into single-particle transitions (hole and electron states for each given excitation). Here we refer to the unoccupied and occupied NTOs as “electron” and “hole” transition orbitals. The computed vertical transitions were calculated at the equilibrium geometry of the  $S_0$  state and described in terms of one-electron excitations of molecular orbitals of the corresponding  $S_0$  geometry. The calculated transitions with moderate intensities ( $f \geq 0.02$ ) can be envisaged going from the lower to the higher energy region of the spectrum. The rhodium atom was described by a double- $\zeta$  basis set with the effective core potential of Hay and Wadt (LANL2DZ)<sup>10</sup> and the 6-311+G(d,p) basis set<sup>11</sup> was used for the other elements present in the complexes except P, Cl and Br to optimize the ground state geometries. The 6-311G (d,p) basis set was used for P, Cl and Br to optimize the compounds. The calculated electronic density plots for frontier molecular orbitals were prepared by using the GaussView 5.0 software. GaussSum program, version 2.2<sup>12</sup> was used to calculate the molecular orbital contributions from groups or atoms.

## References

- 1 G. M. Sheldrick, *Acta Crystallogr.*, 2008, **A64**, 112.
- 2 G. M. Sheldrick, SHELXTL Version 6.14, Bruker AXS Inc., Madison, WI, 2003.
- 3 G. M. Sheldrick, SADABS; Bruker AXS, Inc.: Madison, WI, 2007.
- 4 A. L. Spek, *PLATON. J. Appl. Crystallogr.*, 2003, **36**, 7–13.

- 5 C. K. Johnson, Report ORNL-5138, Oak Ridge National Laboratory, Oak Ridge, TN, 1976.
- 6 (a) A. D. Becke, *J. Chem. Phys.*, 1993, **98**, 5648–5652; (b) C. Lee, W. Yang and R. G. Parr, *Phys. Rev. B*, 1988, **37**, 785–789.
- 7 M. J. Frisch, G. W. Trucks, H. B. Schlegel, G. E. Scuseria, M. A. Robb, J. R. Cheeseman, G. Scalmani, V. Barone, B. Mennucci, G. A. Petersson, H. Nakatsuji, M. Caricato, X. Li, H. P. Hratchian, A. F. Izmaylov, J. Bloino, G. Zheng, J. L. Sonnenberg, M. Hada, M. Ehara, K. Toyota, R. Fukuda, J. Hasegawa, M. Ishida, T. Nakajima, Y. Honda, O. Kitao, H. Nakai, T. Vreven, J. A. Montgomery Jr, J. E. Peralta, F. Ogliaro, M. Bearpark, J. J. Heyd, E. Brothers, K. N. Kudin, V. N. Staroverov, R. Kobayashi, J. Normand, K. Raghavachari, A. Rendell, J. C. Burant, S. S. Iyengar, J. Tomasi, M. Cossi, N. Rega, J. M. Millam, M. Klene, J. E. Knox, J. B. Cross, V. Bakken, C. Adamo, J. Jaramillo, R. Gomperts, R. E. Stratmann, O. Yazyev, A. J. Austin, R. Cammi, C. Pomelli, J. W. Ochterski, R. L. Martin, K. Morokuma, V. G. Zakrzewski, G. A. Voth, P. Salvador, J. J. Dannenberg, S. Dapprich, A. D. Daniels, O. Farkas, J. B. Foresman, J. V. Ortiz, J. Cioslowski and D. J. Fox, Gaussian 09 Revision A.02, Gaussian, Inc., Wallingford, CT, 2009.
- 8 (a) J. Autschbach, T. Ziegler, S. J. A. Gisbergen and E. J. Baerends, *J. Chem. Phys.*, 2002, **116**, 6930–6940; (b) K. L. Bak, P. Jørgensen, T. Helgaker, K. Ruud and H. J. A. Jensen, *J. Chem. Phys.*, 1993, **98**, 8873–8887; (c) T. Helgaker and P. Jørgensen, *J. Chem. Phys.*, 1991, **95**, 2595–2601; (d) E. K. U. Gross and W. Kohn, *Adv. Quantum Chem.*, 1990, **21**, 255–291.
- 9 (a) M. Cossi, N. Rega, G. Scalmani and V. Barone, *J. Comput. Chem.*, 2003, **24**, 669–681; (b) M. Cossi and V. Barone, *J. Chem. Phys.*, 2001, **115**, 4708–4717; (c) V. Barone and M. Cossi, *J. Phys. Chem. A*, 1998, **102**, 1995–2001.
- 10 (a) P. J. Hay and W. R. Wadt, *J. Chem. Phys.*, 1985, **82**, 299–310; (b) P. J. Hay and W. R. Wadt, *J. Chem. Phys.*, 1985, **82**, 270–283.
- 11 (a) M. S. Gordon, J. S. Binkley, J. A. Pople, W. J. Pietro and W. J. Hehre, *J. Am. Chem. Soc.*, 1982, **104**, 2797–2803; (b) J. S. Binkley, J. A. Pople and W. J. Hehre, *J. Am. Chem. Soc.*, 1980, **102**, 939–947.
- 12 N. M. O'Boyle, A. L. Tenderholt and K. M. Langner, *J. Comput. Chem.*, 2008, **29**, 839–845.

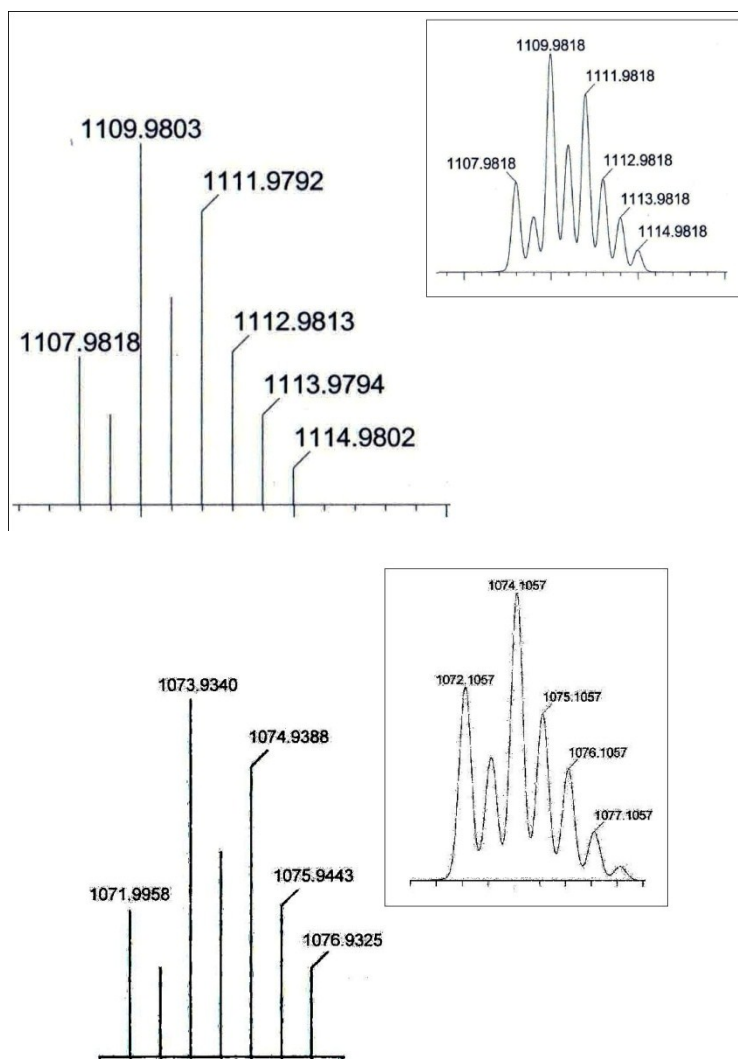

**Fig. S1** High-resolution mass spectra of **1** (top) and **2a** (bottom) compounds. Inset: simulated isotropic pattern.

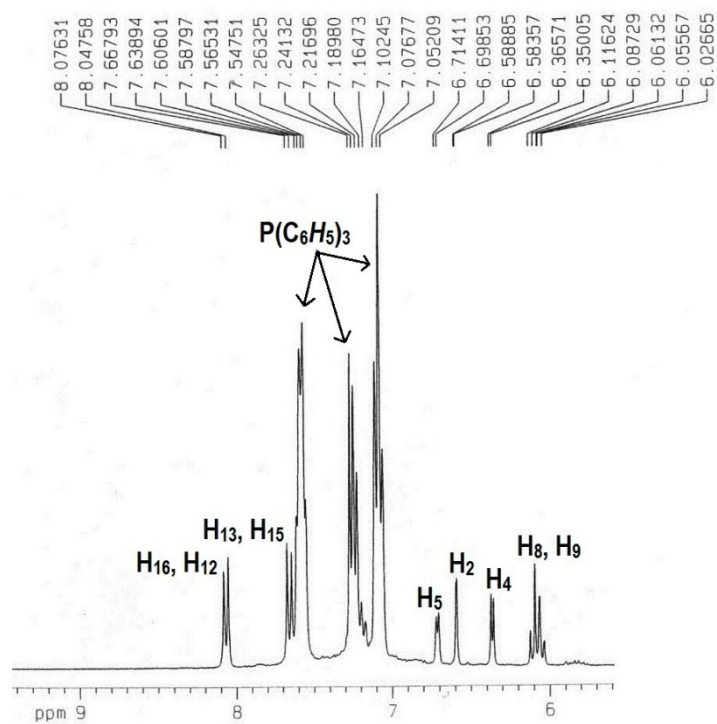

**Fig. S2**  $^1\text{H}$  NMR spectrum of **1** (H labeling is in accordance with the X-ray structure).

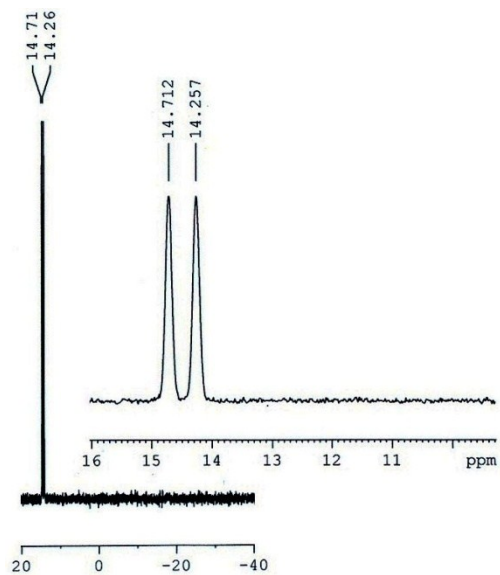

**Fig. S3**  $^{31}\text{P}$  NMR spectrum of **1**.

**Table S1** Crystal data and structure refinement parameters for complex **1**

|                                                                                |                                                                                                           |
|--------------------------------------------------------------------------------|-----------------------------------------------------------------------------------------------------------|
| Empirical formula                                                              | C <sub>52</sub> H <sub>39</sub> Br <sub>2</sub> ClN <sub>5</sub> OP <sub>2</sub> Rh·1/2CH <sub>3</sub> CN |
| fw                                                                             | 1130.53                                                                                                   |
| <i>T</i> /K                                                                    | 130                                                                                                       |
| Crystal system                                                                 | Monoclinic                                                                                                |
| Space group                                                                    | <i>P</i> 2 <sub>1</sub> / <i>c</i>                                                                        |
| <i>a</i> / Å                                                                   | 31.4850(11)                                                                                               |
| <i>b</i> / Å                                                                   | 16.3476(5)                                                                                                |
| <i>c</i> / Å °                                                                 | 19.3520(6)                                                                                                |
| <i>α</i> /deg                                                                  | 90                                                                                                        |
| <i>β</i> /deg                                                                  | 99.3320(10)                                                                                               |
| <i>γ</i> /deg                                                                  | 90                                                                                                        |
| <i>V</i> / Å <sup>3</sup>                                                      | 9828.7(5)                                                                                                 |
| <i>Z</i>                                                                       | 4                                                                                                         |
| <i>D</i> <sub>c</sub> /Mgm <sup>-3</sup>                                       | 1.528                                                                                                     |
| <i>μ</i> /mm <sup>-1</sup>                                                     | 2.138                                                                                                     |
| <i>F</i> (000)                                                                 | 4536                                                                                                      |
| cryst size/mm <sup>3</sup>                                                     | 0.42×0.33×0.23                                                                                            |
| <i>θ</i> /deg                                                                  | 2.3-28.4                                                                                                  |
| measured reflns                                                                | 153092                                                                                                    |
| unique reflns/ <i>R</i> <sub>int</sub>                                         | 24442 / 0.0516                                                                                            |
| GOF on <i>F</i> <sup>2</sup>                                                   | 1.078                                                                                                     |
| <i>R</i> 1, <sup>a</sup> <i>wR</i> 2 <sup>b</sup> [ <i>I</i> > 2σ( <i>I</i> )] | 0.0452, 0.0912                                                                                            |
| <i>R</i> 1, <i>wR</i> 2                                                        | 0.0690, 0.1048                                                                                            |

<sup>a</sup>*R*1 =  $\sum |F_o| - |F_c| / \sum |F_o|$ . <sup>b</sup>*wR*2 =  $[\sum w(F_o^2 - F_c^2)^2 / \sum w(F_o^2)^2]^{1/2}$ .

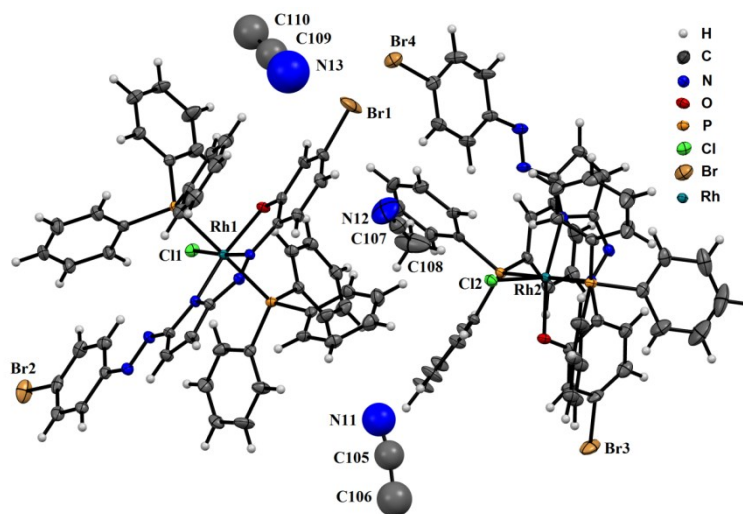

**Fig. S4** Asymmetric unit of **1** showing two rhodium complexes and three acetonitrile solvate molecules.

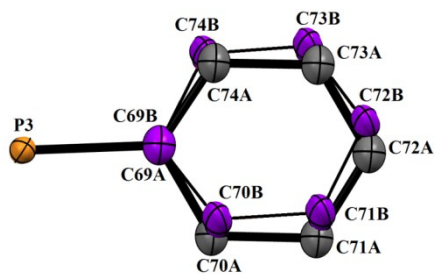

**Fig. S5** The rotational disorder of the phenyl ring showing the two different parts (A and B).



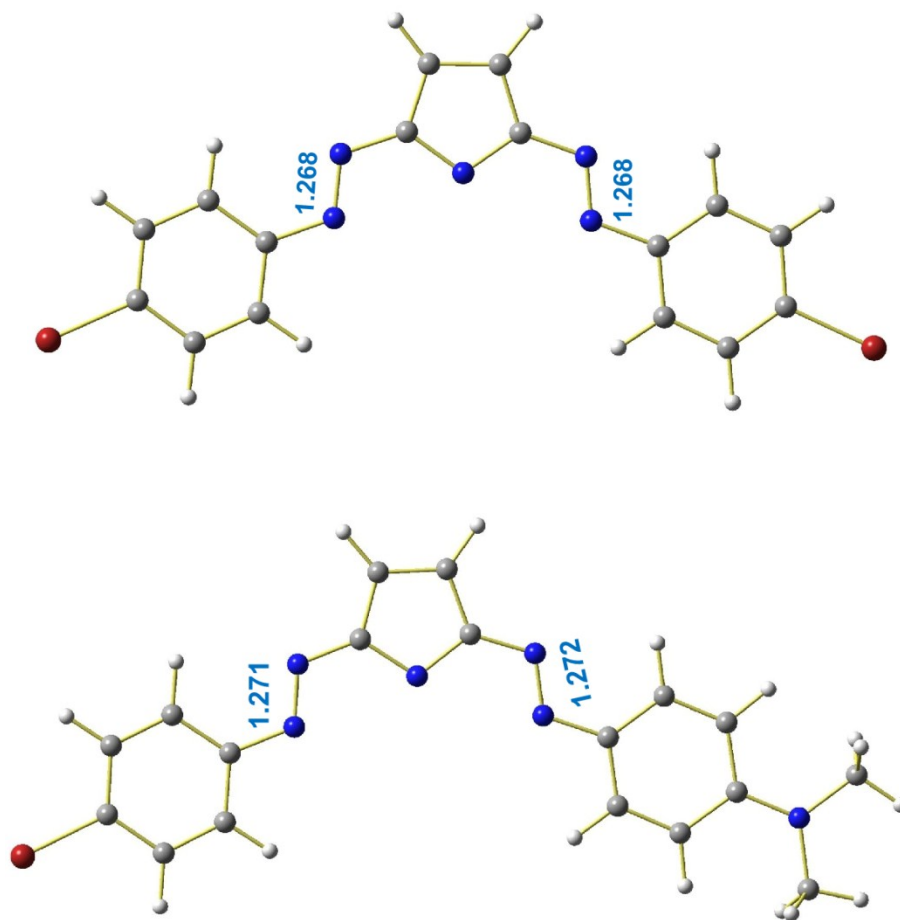

**Fig. S6** Optimized Structure of Ligand **HL<sub>1</sub>**(top) and **HL<sub>2</sub>** (bottom).

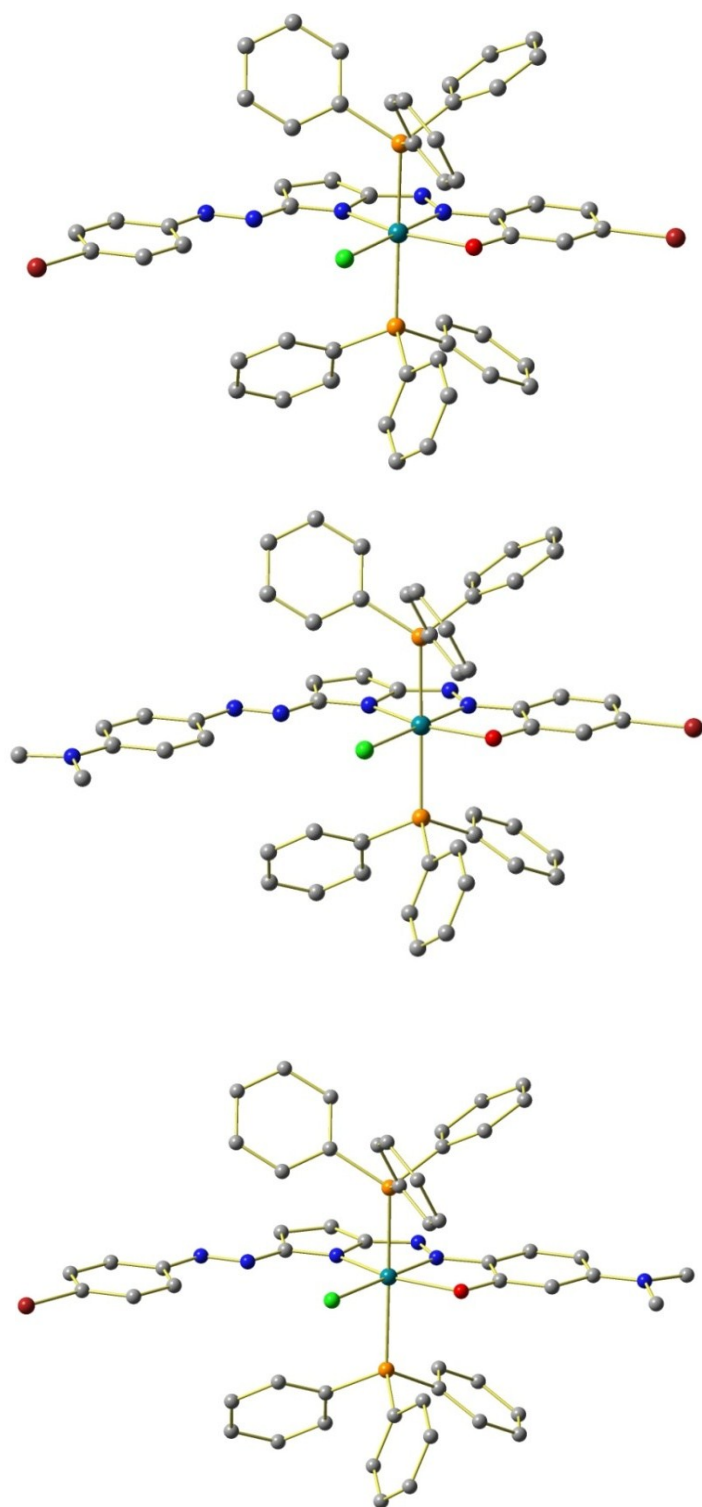

**Fig. S7** Optimized molecular structures of **1** (top), **2a** (middle) and **2b** (bottom) (Rh: cyan, N: blue, O: red, C: grey, Br: deep red, Cl: green, P: saffron. Hydrogen atoms are omitted for clarity).

**Table S2** Selected optimized geometrical parameters of **1** and **2a** in the ground and lower lying triplet excited states at B3LYP level

| <b>Bond lengths (Å)</b> |        |        |             |        |        |
|-------------------------|--------|--------|-------------|--------|--------|
| <b>1</b>                |        |        | <b>2a</b>   |        |        |
|                         | $S_0$  | $T_1$  |             | $S_0$  | $T_1$  |
| Rh1–Cl3                 | 2.446  | 2.443  | Rh1–Cl3     | 2.451  | 2.448  |
| Rh1–P5                  | 2.473  | 2.478  | Rh1–P4      | 2.471  | 2.472  |
| Rh1–P6                  | 2.476  | 2.478  | Rh1–P5      | 2.471  | 2.476  |
| Rh1–O12                 | 2.120  | 2.133  | Rh1–O11     | 2.120  | 2.135  |
| Rh1–N10                 | 2.090  | 2.081  | Rh1–N9      | 2.092  | 2.082  |
| Rh1–N7                  | 1.996  | 1.993  | Rh1–N6      | 1.996  | 1.992  |
| N7–N8                   | 1.280  | 1.357  | N6–N7       | 1.283  | 1.353  |
| N11–N97                 | 1.266  | 1.325  | N10–N96     | 1.269  | 1.333  |
| <b>Bond Angles (°)</b>  |        |        |             |        |        |
|                         | $S_0$  | $T_1$  |             | $S_0$  | $T_1$  |
| Cl3–Rh1–P5              | 86.54  | 86.48  | Cl3–Rh1–P4  | 86.71  | 86.51  |
| Cl3–Rh1–P6              | 86.94  | 86.49  | Cl3–Rh1–P5  | 86.98  | 86.56  |
| Cl3–Rh1–O12             | 98.39  | 100.10 | Cl3–Rh1–O11 | 98.27  | 100.10 |
| Cl3–Rh1–N10             | 103.79 | 102.99 | Cl3–Rh1–N9  | 103.88 | 102.84 |
| Cl3–Rh1–N7              | 178.81 | 179.47 | Cl3–Rh1–N6  | 178.67 | 179.67 |
| P5–Rh1–P6               | 172.08 | 171.12 | P5–Rh1–P4   | 172.28 | 171.17 |
| P5–Rh1–O12              | 88.49  | 87.95  | P5–Rh1–O11  | 87.87  | 87.43  |
| P5–Rh1–N10              | 93.03  | 93.43  | P5–Rh1–N9   | 92.96  | 93.62  |
| P5–Rh1–N7               | 93.34  | 93.49  | P5–Rh1–N6   | 93.08  | 93.56  |
| P6–Rh1–O12              | 88.01  | 87.95  | P4–Rh1–O11  | 88.65  | 88.41  |
| P6–Rh1–N10              | 92.89  | 93.43  | P4–Rh1–N9   | 92.87  | 93.25  |
| P6–Rh1–N7               | 93.09  | 93.49  | P4–Rh1–N6   | 93.14  | 93.34  |
| O12–Rh1–N10             | 157.82 | 156.90 | O11–Rh1–N9  | 157.85 | 157.06 |
| O12–Rh1–N7              | 80.42  | 79.37  | O11–Rh1–N6  | 80.41  | 79.60  |
| N10–Rh1–N7              | 77.39  | 77.53  | N9–Rh1–N6   | 77.44  | 77.46  |

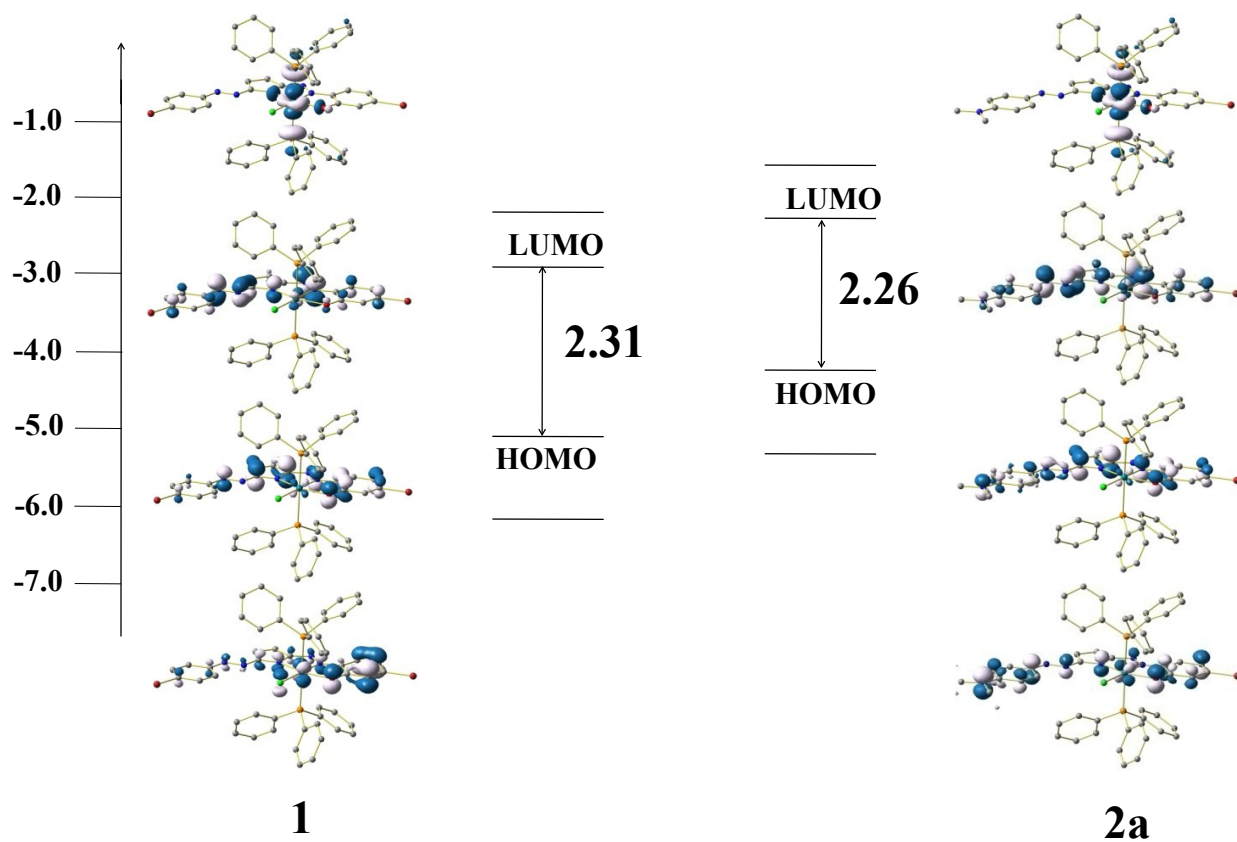

**Fig. S8** Isodensity surface plots of some selected FMOs (HOMO – 1 to LUMO + 1) for the complexes **1** and **2a** at their optimized  $S_0$  geometry in gas phase (isodensity value  $0.05 \text{ e Bohr}^{-3}$ ).

**Table S3** Frontier Molecular Orbital Composition (%) in the Ground State for **1**

| Orbital                                                         | MO   | Energy | Contribution(%) |                   |      |           |         |    |                      |    | Main Bond Type                       |                                  |
|-----------------------------------------------------------------|------|--------|-----------------|-------------------|------|-----------|---------|----|----------------------|----|--------------------------------------|----------------------------------|
|                                                                 |      |        | Rh              | Azo1<br>(ligated) | Azo2 | pyrrolido | phenoxy |    | PP<br>h <sub>3</sub> | Cl |                                      |                                  |
|                                                                 |      |        |                 |                   |      |           | Ph      | O  |                      |    |                                      |                                  |
| 270                                                             | L+5  | -1.1   | 1               | 1                 | 0    | 0         | 1       | 0  | 96                   | 0  | $\pi^*(PPh_3)$                       |                                  |
| 269                                                             | L+4  | -1.13  | 0               | 0                 | 0    | 2         | 0       | 0  | 98                   | 0  | $\pi^*(PPh_3)$                       |                                  |
| 268                                                             | L+3  | -1.73  | 5               | 16                | 2    | 7         | 2       | 5  | 4                    | 11 | $4d_{x^2-y^2}(Rh)+\pi^*(Azo1)+3p(O)$ |                                  |
| 267                                                             | L+2  | -1.85  | 1               | 13                | 23   | 29        | 30      | 0  | 4                    | 0  | $\pi^*(Ph+Pyrrolido+Azo2+Azo1)$      |                                  |
| 266                                                             | L+1  | -2.39  | 3               | 8                 | 0    | 0         | 5       | 2  | 2                    | 55 | 2                                    | $\pi^*(PPh_3)+4d_z^2(Rh)$        |
| 265                                                             | LUMO | -2.95  | 3               | 27                | 22   | 15        | 30      | 1  | 1                    | 1  | 0                                    | $\pi^*(Ph+Azo1+Azo2+Pyrrolido)$  |
| 264                                                             | HOMO | -5.26  | 2               | 7                 | 6    | 32        | 40      | 10 | 2                    | 0  | 0                                    | $\pi(Ph+Pyrrolido)+2p(O)$        |
| 263                                                             | H-1  | -6.16  | 9               | 5                 | 3    | 11        | 47      | 13 | 6                    | 6  | 6                                    | $\pi(Ph+Pyrrolido)+2p(O)$        |
| 262                                                             | H-2  | -6.23  | 6               | 0                 | 50   | 7         | 6       | 2  | 3                    | 26 | 26                                   | $\pi(Azo2)+3p(Cl)$               |
| 261                                                             | H-3  | -6.35  | 8               | 0                 | 1    | 13        | 7       | 1  | 45                   | 26 | 26                                   | $\pi(PPh_3+Pyrrolido)+3p(Cl)$    |
| 260                                                             | H-4  | -6.51  | 1               | 7                 | 0    | 30        | 6       | 3  | 4                    | 6  | 35                                   | $\pi(Azo2)+4d_{zx}(Rh)+3p(Cl)$   |
| 259                                                             | H-5  | -6.63  | 7               | 1                 | 0    | 13        | 18      | 1  | 27                   | 33 | 33                                   | $\pi(PPh_3+Ph+Pyrrolido)+3p(Cl)$ |
| HOMO–LUMO gap = 2.31 eV<br>Total Energy = -8755.3421774 Hartree |      |        |                 |                   |      |           |         |    |                      |    |                                      |                                  |

**Table S4** Frontier Molecular Orbital Composition (%) in the Ground State for **2a**

| Orbital                                                         | MO        | Energy (eV) | Rh | Contribution(%) |             |           |         |    |                  |    | Cl                                            | Main Bond Type |
|-----------------------------------------------------------------|-----------|-------------|----|-----------------|-------------|-----------|---------|----|------------------|----|-----------------------------------------------|----------------|
|                                                                 |           |             |    | Azo1 (ligated)  | Azo2 (free) | pyrrolido | phenoxy |    | PPH <sub>3</sub> |    |                                               |                |
|                                                                 |           |             |    |                 |             |           | Ph      | O  |                  |    |                                               |                |
| 265                                                             | L+5       | -0.93       | 2  | 0               | 0           | 0         | 0       | 0  | 98               | 0  | $\pi^*(PPh_3)$                                |                |
| 264                                                             | L+4       | -0.96       | 0  | 0               | 1           | 1         | 0       | 0  | 98               | 0  | $\pi^*(PPh_3)$                                |                |
| 263                                                             | L+3       | -1.47       | 5  | 17              | 2           | 7         | 2       | 5  | 4                | 10 | $4d_{x^2-y^2}(Rh)+\pi^*(Azo1)+3p(Cl)+\pi(Ph)$ |                |
| 262                                                             | L+2       | -1.49       | 1  | 11              | 27          | 27        | 28      | 0  | 6                | 0  | $\pi^*(Pyrrolido+Azo2+Azo1)$                  |                |
| 261                                                             | L+1       | -2.16       | 3  | 0               | 0           | 5         | 2       | 1  | 55               | 2  | $\pi^*(PPh_3)+4d_z^2(Rh)+\pi(Ph)$             |                |
| 260                                                             | LUMO<br>O | -2.58       | 3  | 28              | 19          | 17        | 31      | 1  | 1                | 0  | $\pi^*(Ph+Azo1+Azo2+Pyrrolido)$               |                |
| 259                                                             | HOMO<br>O | -4.84       | 2  | 7               | 6           | 29        | 48      | 7  | 2                | 0  | $\pi(Ph+Pyrrolido)$                           |                |
| 258                                                             | H-1       | -5.62       | 6  | 3               | 5           | 7         | 67      | 11 | 1                | 0  | $\pi(Ph)+2p(O)$                               |                |
| 257                                                             | H-2       | -5.92       | 3  | 0               | 64          | 6         | 8       | 1  | 2                | 16 | $\pi(Azo2)+3p(Cl)$                            |                |
| 256                                                             | H-3       | -6.07       | 5  | 3               | 1           | 9         | 24      | 4  | 30               | 24 | $\pi(PPh_3+Ph)+3p(Cl)$                        |                |
| 255                                                             | H-4       | -6.24       | 2  | 0               | 17          | 3         | 4       | 5  | 4                | 45 | $4d_{zx}(Rh)+\pi(Azo2)+3p(Cl)$                |                |
| 254                                                             | H-5       | -6.27       | 7  | 2               | 3           | 15        | 40      | 4  | 17               | 12 | $\pi(Ph+PPh_3+Pyrrolido)+3p(Cl)$              |                |
| HOMO–LUMO gap = 2.26 eV<br>Total Energy = -6315.7943522 Hartree |           |             |    |                 |             |           |         |    |                  |    |                                               |                |

**Table S5** Frontier Molecular Orbital Composition (%) in the Ground State for **2b**

| Orbital                              | MO  | Energy | R | Contribution(%)  |                |               |         |    |                      |   | Cl                                     | Main Bond Type |
|--------------------------------------|-----|--------|---|------------------|----------------|---------------|---------|----|----------------------|---|----------------------------------------|----------------|
|                                      |     |        |   | Azo1<br>(ligate) | Azo2<br>(free) | pyrrol<br>ido | phenoxi |    | PP<br>h <sub>3</sub> |   |                                        |                |
|                                      |     |        |   |                  |                |               | Ph      | O  |                      |   |                                        |                |
| 265                                  | L+5 | -0.96  | 1 | 1                | 0              | 2             | 1       | 0  | 95                   | 0 | $\pi^*(PPh_3)$                         |                |
| 264                                  | L+4 | -0.99  | 0 | 0                | 0              | 1             | 0       | 1  | 98                   | 0 | $\pi^*(PPh_3)$                         |                |
| 263                                  | L+3 | -1.48  | 5 | 15               | 2              | 8             | 5       | 5  | 3                    | 1 | $4d_{x^2-y^2}(Rh)+\pi^*(Azo1+Phenola)$ |                |
| 262                                  | L+2 | -1.53  | 1 | 16               | 20             | 28            | 29      | 0  | 5                    | 0 | $\pi^*(Ph+Pyrrolido+Azo2+Azo1)$        |                |
| 261                                  | L+1 | -2.18  | 3 | 0                | 0              | 4             | 2       | 1  | 56                   | 2 | $\pi^*(PPh_3)+4d_z^2(Rh)$              |                |
| 260                                  | LUM | -2.58  | 2 | 25               | 23             | 14            | 33      | 1  | 1                    | 0 | $\pi^*(Ph+Azo1+Azo2+Pyrrolido)$        |                |
| 259                                  | HOM | -4.8   | 1 | 6                | 7              | 32            | 48      | 5  | 1                    | 0 | $\pi(Ph+Pyrrolido)$                    |                |
| 258                                  | H-1 | -5.77  | 6 | 0                | 0              | 2             | 67      | 19 | 6                    | 0 | $\pi(Ph)+2p(O)$                        |                |
| 257                                  | H-2 | -5.95  | 3 | 0                | 63             | 9             | 7       | 1  | 2                    | 1 | $\pi(Azo2)+3p(Cl)$                     |                |
| 256                                  | H-3 | -6     | 8 | 7                | 6              | 18            | 55      | 1  | 2                    | 3 | $\pi(Pyrrolido+Ph)$                    |                |
| 255                                  | H-4 | -6.16  | 9 | 1                | 0              | 14            | 2       | 0  | 40                   | 3 | $\pi(PPh_3)+\pi(Pyrrolido)+3p(Cl)$     |                |
| 254                                  | H-5 | -6.26  | 2 | 0                | 17             | 5             | 4       | 5  | 4                    | 4 | $4d_{zx}(Rh)+\pi(Azo2)+3p(Cl)$         |                |
| HOMO–LUMO gap = 2.22 eV              |     |        |   |                  |                |               |         |    |                      |   |                                        |                |
| Total Energy = -6315.7931338 Hartree |     |        |   |                  |                |               |         |    |                      |   |                                        |                |

**Table S6** Frontier Molecular Orbital Composition (%) for **1<sup>•+</sup>** ( $D = \frac{1}{2}$ )

| Orbital | $\alpha$ -M<br>O | Energy<br>(eV) | Rh     | Contribution(%)   |                    |               |               |   |                      |        | PP<br>h <sub>3</sub>                      | Cl | Main Bond Type |
|---------|------------------|----------------|--------|-------------------|--------------------|---------------|---------------|---|----------------------|--------|-------------------------------------------|----|----------------|
|         |                  |                |        | Azo1<br>(ligated) | Azo<br>2<br>(free) | pyrrolid<br>o | phenoxi<br>do |   | PP<br>h <sub>3</sub> | Cl     |                                           |    |                |
|         |                  |                |        |                   |                    |               | Ph            | O |                      |        |                                           |    |                |
| 270     | L+5              | -3.35          | 0      | 0                 | 0                  | 4             | 0             | 0 | 96                   | 0      | $\pi^*(PPh_3)$                            |    |                |
| 269     | L+4              | -3.42          | 1      | 1                 | 0                  | 2             | 30            | 1 | 65                   | 0      | $\pi^*(PPh_3)+\pi^*(Ph)$                  |    |                |
| 268     | L+3              | -4.46          | 5<br>1 | 15                | 1                  | 5             | 4             | 3 | 9                    | 1<br>4 | $4d_{x^2-y^2}(Rh)+\pi^*(Azo1)+3p(Cl)$     |    |                |
| 267     | L+2              | -4.72          | 1      | 13                | 28                 | 30            | 27            | 0 | 2                    | 0      | $\pi^*(Pyrrolido+Azo2+Ph+Azo1)$           |    |                |
| 266     | L+1              | -5.00          | 4<br>3 | 0                 | 0                  | 7             | 4             | 2 | 48                   | 1      | $\pi^*(PPh_3)+4d_z^2(Rh)$                 |    |                |
| 265     | LUM<br>O         | -5.91          | 3      | 26                | 20                 | 18            | 31            | 1 | 2                    | 0      | $\pi^*(Ph+Azo1+Azo2+Pyrrolido)$           |    |                |
| 264     | SOM<br>O         | -8.17          | 3      | 8                 | 6                  | 26            | 51            | 7 | 6                    | 0      | $\pi(Pyrrolido+Ph)$                       |    |                |
| 263     | H-1              | -8.68          | 6      | 1                 | 0                  | 2             | 2             | 0 | 61                   | 2<br>7 | $\pi(PPh_3)+3p(Cl)$                       |    |                |
| 262     | H-2              | -8.83          | 1<br>1 | 1                 | 12                 | 2             | 4             | 1 | 16                   | 5<br>5 | $4d_{yz}(Rh)+\pi(Azo2)+3p(Cl)+\pi(PPh_3)$ |    |                |
| 261     | H-3              | -8.96          | 3      | 0                 | 0                  | 2             | 8             | 1 | 60                   | 2<br>6 | $\pi(PPh_3)+3p(Cl)$                       |    |                |
| 260     | H-4              | -9.02          | 7      | 3                 | 5                  | 7             | 65            | 7 | 12                   | 1      | $\pi(Ph+Ligand+PPh_3)$                    |    |                |
| 259     | H-5              | -9.13          | 0      | 0                 | 17                 | 5             | 2             | 0 | 76                   | 0      | $\pi(PPh_3)+\pi(Azo2)$                    |    |                |
| Orbital | $\beta$ -M<br>O  | Energy<br>(eV) | Rh     | Contribution(%)   |                    |               |               |   |                      |        | PP<br>h <sub>3</sub>                      | Cl | Main Bond Type |
|         |                  |                |        | Azo1<br>(ligated) | Azo<br>2<br>(free) | pyrrolid<br>o | phenoxi<br>do |   | PP<br>h <sub>3</sub> | Cl     |                                           |    |                |
|         |                  |                |        |                   |                    |               | Ph            | O |                      |        |                                           |    |                |
| 269     | L+5              | -3.36          | 1      | 0                 | 0                  | 2             | 14            | 0 | 82                   | 0      | $\pi^*(PPh_3)+\pi^*(Ph)$                  |    |                |
| 268     | L+4              | -4.44          | 5<br>2 | 15                | 1                  | 0             | 5             | 3 | 8                    | 1<br>4 | $4d_{x^2-y^2}(Rh)+\pi^*(Azo1)+3p(Cl)$     |    |                |
| 267     | L+3              | -4.54          | 1      | 11                | 25                 | 34            | 28            | 0 | 2                    | 0      | $\pi^*(Pyrrolido+Ph+Azo2+Azo1)$           |    |                |
| 266     | L+2              | -4.99          | 4<br>3 | 0                 | 0                  | 7             | 4             | 2 | 48                   | 1      | $\pi^*(PPh_3)+4d_z^2(Rh)$                 |    |                |
| 265     | L+1              | -5.66          | 3      | 21                | 21                 | 14            | 40            | 3 | 2                    | 0      | $\pi^*(Ph+Azo1+Azo2+Pyrrolido)$           |    |                |
| 264     | LUM<br>O         | -6.91          | 2      | 8                 | 7                  | 31            | 50            | 9 | 2                    | 0      | $\pi^*(Pyrrolido+Ph)$                     |    |                |
| 263     | SOM<br>O         | -8.66          | 6      | 2                 | 0                  | 2             | 3             | 1 | 63                   | 2<br>5 | $\pi(PPh_3)+3p(Cl)$                       |    |                |



|     |     |       |        |   |    |   |    |   |    |        |                                                                                      |
|-----|-----|-------|--------|---|----|---|----|---|----|--------|--------------------------------------------------------------------------------------|
| 262 | H-1 | -8.82 | 9      | 5 | 6  | 7 | 53 | 7 | 11 | 9      | $\pi(\text{Ph}+\text{PPh}_3)$                                                        |
| 261 | H-2 | -8.83 | 1<br>1 | 1 | 12 | 3 | 11 | 2 | 15 | 4<br>8 | $\pi(\text{PPh}_3)+4d_{zx}(\text{Rh})+\pi(\text{Azo2})+3p(\text{Cl})+\pi(\text{Ph})$ |
| 260 | H-3 | -8.96 | 3      | 2 | 1  | 1 | 11 | 1 | 57 | 2<br>6 | $\pi(\text{PPh}_3)+3p(\text{Cl})+\pi(\text{Ph})$                                     |
| 259 | H-4 | -9.13 | 0      | 0 | 19 | 5 | 2  | 0 | 73 | 1      | $\pi(\text{PPh}_3+\text{Azo2})$                                                      |
| 258 | H-5 | -9.18 | 0      | 0 | 0  | 1 | 2  | 0 | 95 | 1      | $\pi(\text{PPh}_3)$                                                                  |

**Table S7** Frontier Molecular Orbital Composition (%) for **2a<sup>•+</sup>** ( $D = \frac{1}{2}$ )

| Orbital | $\alpha$ -MO | Energy (eV) | Rh     | Contribution(%) |             |           |           |   |                  |    | Main Bond Type                                                        |
|---------|--------------|-------------|--------|-----------------|-------------|-----------|-----------|---|------------------|----|-----------------------------------------------------------------------|
|         |              |             |        | Azo1 (ligated)  | Azo2 (free) | pyrrolido | phenoxydo |   | PPh <sub>3</sub> | Cl |                                                                       |
|         |              |             |        |                 |             |           | Ph        | O |                  |    |                                                                       |
| 265     | L+5          | -3.08       | 0      | 0               | 1           | 2         | 0         | 0 | 97               | 0  | $\pi^*(\text{PPh}_3)$                                                 |
| 264     | L+4          | -3.09       | 1      | 1               | 0           | 2         | 16        | 0 | 79               | 0  | $\pi^*(\text{PPh}_3)+\pi^*(\text{Ph})$                                |
| 263     | L+3          | -4.07       | 5<br>2 | 15              | 2           | 5         | 3         | 3 | 7                | 13 | $4d_{x^2-y^2}(\text{Rh})+\pi^*(\text{Azo1})+3p(\text{Cl})$            |
| 262     | L+2          | -4.27       | 1      | 13              | 26          | 30        | 28        | 0 | 2                | 0  | $\pi^*(\text{Pyrrolido}+\text{Azo2}+\text{Ph}+\text{Azo1})$           |
| 261     | L+1          | -4.62       | 4<br>2 | 0               | 0           | 7         | 2         | 2 | 50               | 1  | $\pi^*(\text{PPh}_3)+4d_z^2(\text{Rh})$                               |
| 260     | LUMO         | -5.44       | 3      | 25              | 20          | 17        | 33        | 1 | 1                | 0  | $\pi^*(\text{Ph}+\text{Azo1}+\text{Azo2}+\text{Pyrrolido})$           |
| 259     | SOMO         | -7.56       | 2      | 7               | 6           | 22        | 53        | 5 | 4                | 0  | $\pi(\text{Pyrrolido}+\text{Ph})$                                     |
| 258     | H-1          | -8.36       | 6      | 4               | 5           | 7         | 54        | 9 | 11               | 4  | $\pi(\text{Ph})+\pi(\text{PPh}_3)$                                    |
| 257     | H-2          | -8.4        | 7      | 1               | 1           | 5         | 10        | 1 | 49               | 26 | $\pi(\text{Ph})+3p(\text{Cl})+\pi(\text{PPh}_3)$                      |
| 256     | H-3          | -8.49       | 1<br>1 | 1               | 19          | 2         | 4         | 2 | 10               | 52 | $4d_{yz}(\text{Rh})+\pi(\text{Azo2})+\pi(\text{PPh}_3)+3p(\text{Cl})$ |
| 255     | H-4          | -8.69       | 3      | 1               | 0           | 1         | 5         | 0 | 62               | 28 | $\pi(\text{PPh}_3)+3p(\text{Cl})$                                     |
| 254     | H-5          | -8.82       | 2      | 0               | 40          | 8         | 4         | 0 | 38               | 7  | $\pi(\text{PPh}_3)+\pi(\text{Azo2})$                                  |
|         |              |             |        | Contribution(%) |             |           |           |   |                  |    | Main Bond Type                                                        |

| Orbital | $\beta$ -MO | Energy (eV) | Rh     | Azo1 (ligated) | Azo2 (free) | pyrrolido | phenoxydo |   | PPH <sub>3</sub> | Cl |                                       |
|---------|-------------|-------------|--------|----------------|-------------|-----------|-----------|---|------------------|----|---------------------------------------|
|         |             |             |        |                |             |           | Ph        | O |                  |    |                                       |
| 264     | L+5         | -3.08       | 0      | 0              | 1           | 2         | 0         | 0 | 97               | 0  | $\pi^*(PPh_3)$                        |
| 263     | L+4         | -4.05       | 5<br>2 | 16             | 2           | 5         | 3         | 3 | 7                | 13 | $4d_{x^2-y^2}(Rh)+\pi^*(Azo1)+3p(Cl)$ |
| 262     | L+3         | -4.1        | 1      | 11             | 24          | 35        | 27        | 0 | 2                | 0  | $\pi^*(Pyrrolido+Ph+Azo2+Azo1)$       |
| 261     | L+2         | -4.61       | 4<br>2 | 0              | 0           | 6         | 2         | 2 | 50               | 1  | $4d_{x^2-y^2}(Rh)+\pi^*(PPh_3)$       |
| 260     | L+1         | -5.22       | 3      | 21             | 18          | 13        | 42        | 2 | 1                | 0  | $\pi^*(Ph+Azo1+Azo2+Pyrrolido)$       |
| 259     | LUMO        | -6.42       | 2      | 8              | 6           | 28        | 48        | 6 | 2                | 0  | $\pi^*(Pyrrolido+Ph)$                 |
| 258     | SOMO        | -8.1        | 5      | 6              | 10          | 9         | 62        | 7 | 1                | 0  | $\pi(Ph)+\pi(Azo2)$                   |
| 257     | H-1         | -8.37       | 6      | 1              | 0           | 3         | 4         | 1 | 58               | 27 | $\pi(PPh_3)+3p(Cl)$                   |
| 256     | H-2         | -8.48       | 1<br>1 | 1              | 19          | 2         | 4         | 2 | 9                | 51 | $4d_{zx}(Rh)+\pi(Azo2)+3p(Cl)$        |
| 255     | H-3         | -8.67       | 4      | 1              | 0           | 1         | 6         | 0 | 58               | 30 | $\pi(PPh_3)+3p(Cl)$                   |
| 254     | H-4         | -8.79       | 4      | 2              | 5           | 8         | 58        | 8 | 14               | 0  | $\pi(Ph)+\pi(PPh_3)$                  |
| 253     | H-5         | -8.81       | 2      | 0              | 41          | 8         | 6         | 0 | 36               | 8  | $\pi(PPh_3)+\pi(Azo2)$                |

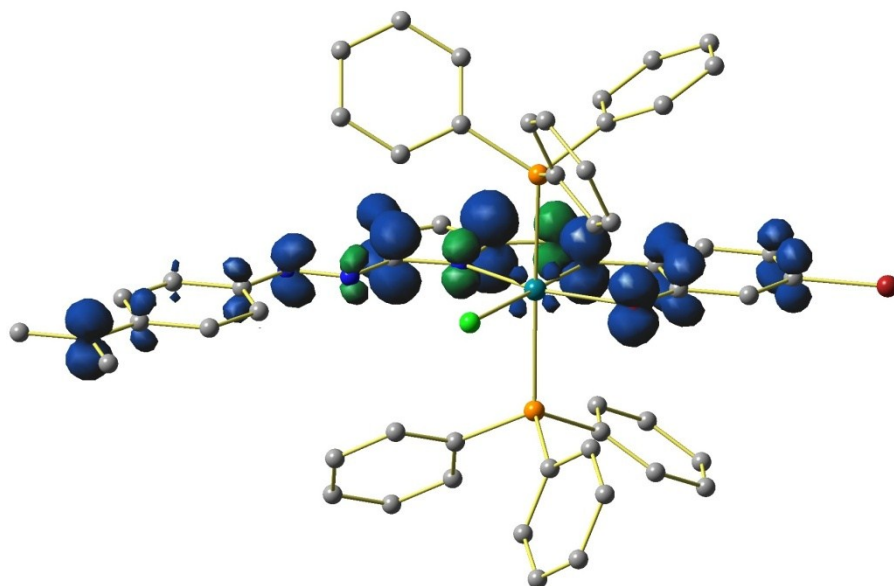

**Fig. S9** Net spin density of  $2\mathbf{a}^{\bullet+}$ . Isodensity value  $0.004 \text{ e Bohr}^{-3}$ .

( $\rho_{\text{L}} = -0.959$  [ $\rho_{\text{Phenoxido}} = -0.405$ ,  $\rho_{\text{Pyrrolido}} = -0.345$ ,  $\rho_{\text{Phenyl}} = -0.194$ ],  $\rho_{\text{Rh}} = +0.00004$ )

**Table S8** Main optical transition at the TD-DFT/B3LYP Level for the complex **1** with composition in terms of molecular orbital contribution of the transition, Computed Vertical excitation energies, and oscillator strength in dichloromethane

| Transition            | CI      | Composition                 | E (eV) | Oscillator strength (f) | $\lambda_{\text{theo}}$ (nm) |
|-----------------------|---------|-----------------------------|--------|-------------------------|------------------------------|
| $S_0 \rightarrow S_1$ | 0.69449 | H $\rightarrow$ L (96%)     | 1.9256 | 0.6483                  | 643.87                       |
| $S_0 \rightarrow S_2$ | 0.67745 | H $\rightarrow$ L+1 (92%)   | 2.1020 | 0.007                   | 589.84                       |
| $S_0 \rightarrow S_4$ | 0.66795 | H $\rightarrow$ L+3 (89%)   | 2.5523 | 0.0017                  | 485.78                       |
| $S_0 \rightarrow S_5$ | 0.67111 | H - 1 $\rightarrow$ L (90%) | 2.7137 | 0.EV3814                | 456.88                       |
| $S_0 \rightarrow S_6$ | 0.67788 | H - 3 $\rightarrow$ L (96%) | 2.7680 | 0.0249                  | 447.92                       |

|                          |                                          |                                                                                                                              |        |        |        |
|--------------------------|------------------------------------------|------------------------------------------------------------------------------------------------------------------------------|--------|--------|--------|
| $S_0 \rightarrow S_9$    | 0.47579<br>0.25433<br>0.23913            | H $\rightarrow$ L + 2(45%)<br>H - 4 $\rightarrow$ L + 3(13%)<br>H - 4 $\rightarrow$ L + 1(11%)                               | 2.9566 | 0.0225 | 419.34 |
| $S_0 \rightarrow S_{10}$ | 0.48034<br>0.01364<br>0.24561<br>0.23648 | H $\rightarrow$ L+2(46%)<br>H - 4 $\rightarrow$ L+1(14%)<br>H - 4 $\rightarrow$ L+3(13%)<br>H - 2 $\rightarrow$ L+1(11%)     | 3.0480 | 0.0587 | 406.77 |
| $S_0 \rightarrow S_{11}$ | 0.39601<br>0.35373<br>0.31075<br>0.25048 | H - 4 $\rightarrow$ L+3(31%)<br>H - 2 $\rightarrow$ L+1(25%)<br>H - 4 $\rightarrow$ L+1(19%)<br>H - 2 $\rightarrow$ L+3(13%) | 3.1363 | 0.0053 | 395.32 |
| $S_0 \rightarrow S_{12}$ | 0.46638<br>0.26094<br>0.23795            | H - 3 $\rightarrow$ L+1(44%)<br>H - 5 $\rightarrow$ L+1(14%)<br>H - 1 $\rightarrow$ L + 1(11%)                               | 3.1730 | 0.1678 | 390.75 |
| $S_0 \rightarrow S_{14}$ | 0.53678<br>0.41138                       | H - 6 $\rightarrow$ L(58%)<br>H - 7 $\rightarrow$ L(34%)                                                                     | 3.2860 | 0.0340 | 377.31 |
| $S_0 \rightarrow S_{17}$ | 0.48900<br>0.24313<br>0.23328            | H - 5 $\rightarrow$ L+1<br>H - 3 $\rightarrow$ L + 3<br>H - 1 $\rightarrow$ L+ 1                                             | 3.4595 | 0.0514 | 358.39 |
| $S_0 \rightarrow S_{18}$ | 0.45797<br>0.32370                       | H - 7 $\rightarrow$ L<br>H - 6 $\rightarrow$ L                                                                               | 3.4606 | 0.0478 | 358.27 |
| $S_0 \rightarrow S_{19}$ | 0.56443<br>0.27394                       | H-8 $\rightarrow$ L<br>H-2 $\rightarrow$ L+ 2                                                                                | 3.5175 | 0.0053 | 352.48 |
| $S_0 \rightarrow S_{20}$ | 0.55139<br>0.25543                       | H-12 $\rightarrow$ L<br>H-9 $\rightarrow$ L                                                                                  | 3.5724 | 0.0096 | 347.06 |
| $S_0 \rightarrow S_{27}$ | 0.37236<br>0.31547<br>0.25410<br>-0.2225 | H -14 $\rightarrow$ L<br>H $\rightarrow$ L+5<br>H- 6 $\rightarrow$ L+1<br>H-7 $\rightarrow$ L+1                              | 3.6935 | 0.1407 | 335.68 |

**Table S9** Main optical transition at the TD-DFT/B3LYP Level for the complex **2a** with composition in terms of molecular orbital contribution of the transition, Computed Vertical excitation energies, and oscillator strength in dichloromethane

| Transition               | CI                            | Composition                                                                                        | E (eV) | Oscillat or strengt h (f) | $\lambda_{\text{theo}}$ (nm) |
|--------------------------|-------------------------------|----------------------------------------------------------------------------------------------------|--------|---------------------------|------------------------------|
| $S_0 \rightarrow S_1$    | 0.69582                       | H $\rightarrow$ L (97%)                                                                            | 1.8857 | 0.9459                    | 657.49                       |
| $S_0 \rightarrow S_2$    | 0.67490                       | H $\rightarrow$ L+1(91%)                                                                           | 1.9478 | 0.0086                    | 636.53                       |
| $S_0 \rightarrow S_3$    | 0.63307                       | H $\rightarrow$ L+2(80%)                                                                           | 2.4130 | 0.001                     | 513.81                       |
| $S_0 \rightarrow S_5$    | 0.66491                       | H - 1 $\rightarrow$ L (88%)                                                                        | 2.5122 | 0.1747                    | 493.52                       |
| $S_0 \rightarrow S_6$    | 0.57119<br>0.22437            | H - 1 $\rightarrow$ L+1(65%)<br>H - 4 $\rightarrow$ L+1(10%)                                       | 2.5895 | 0.0002                    | 478.79                       |
| $S_0 \rightarrow S_9$    | 0.38450<br>0.32121<br>0.28109 | H - 5 $\rightarrow$ L + 1(30%)<br>H - 2 $\rightarrow$ L + 1(21%)<br>H - 5 $\rightarrow$ L + 2(16%) | 3.0296 | 0.0235                    | 409.24                       |
| $S_0 \rightarrow S_{10}$ | 0.63015                       | H - 5 $\rightarrow$ L (79%)                                                                        | 3.0323 | 0.0006                    | 408.88                       |
| $S_0 \rightarrow S_{11}$ | 0.46045<br>0.33061<br>0.24185 | H - 5 $\rightarrow$ L+2(42%)<br>H - 2 $\rightarrow$ L+1(22%)<br>H - 5 $\rightarrow$ L+1(12%)       | 3.1237 | 0.0035                    | 396.91                       |
| $S_0 \rightarrow S_{12}$ | 0.48760<br>0.25276            | H- 1 $\rightarrow$ L+2(48%)<br>H- 5 $\rightarrow$ L (13%)                                          | 3.1363 | 0.024                     | 395.31                       |
| $S_0 \rightarrow S_{14}$ | 0.54062<br>0.25349<br>0.25489 | H- 4 $\rightarrow$ L (58%)<br>H- 3 $\rightarrow$ L(13%)<br>H $\rightarrow$ L+3(13%)                | 3.2422 | 0.14                      | 382.40                       |
| $S_0 \rightarrow S_{17}$ | 0.65122                       | H - 6 $\rightarrow$ L(85%)                                                                         | 3.3637 | 0.033                     | 368.59                       |
| $S_0 \rightarrow S_{18}$ | 0.5449<br>0.4289              | H $\rightarrow$ L+4 (59%)<br>H $\rightarrow$ L +5(37%)                                             | 3.4357 | 0.0001                    | 360.87                       |
| $S_0 \rightarrow S_{19}$ | 0.35099<br>0.27854<br>0.23035 | H - 6 $\rightarrow$ L +1(25%)<br>H - 3 $\rightarrow$ L + 1(16%)<br>H $\rightarrow$ L+4(11%)        | 3.4613 | 0.0446                    | 358.20                       |

|                          |                                          |                                                                                                       |        |        |        |
|--------------------------|------------------------------------------|-------------------------------------------------------------------------------------------------------|--------|--------|--------|
|                          |                                          |                                                                                                       |        |        |        |
| $S_0 \rightarrow S_{20}$ | 0.55139<br>0.25543                       | H - 12 $\rightarrow$ L<br>H - 9 $\rightarrow$ L                                                       | 3.4696 | 0.0096 | 347.06 |
| $S_0 \rightarrow S_{27}$ | 0.37236<br>0.31547<br>0.25410<br>-0.2225 | H - 14 $\rightarrow$ L<br>H $\rightarrow$ L + 5<br>H - 6 $\rightarrow$ L+1<br>H - 7 $\rightarrow$ L+1 | 3.6935 | 0.1407 | 335.68 |

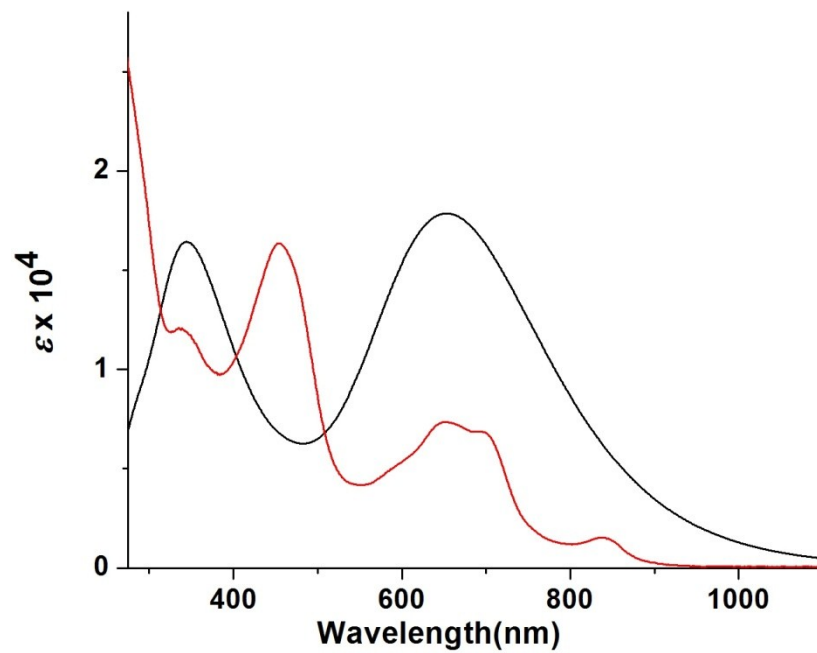

**Fig. S10** Experimental (red) and theoretical (black) absorption spectra of **2a** in dichloromethane.

| $\lambda_{\text{expt}}$ |                                                                                                                                                                                             | Hole | Electron |
|-------------------------|---------------------------------------------------------------------------------------------------------------------------------------------------------------------------------------------|------|----------|
| 697,<br>654<br>nm       | $S_1$<br>$w = 0.96$<br>1.9256 (0.6483)<br>643.87 nm<br><br>ILCT<br>$\pi(\text{phenoxido} + \text{pyrrolido}) \rightarrow \pi^*(\text{azo1} + \text{azo2})$                                  |      |          |
| 467<br>nm               | $S_5$<br>$w = 0.90$<br>2.7137 (0.3814)<br>456.87 nm<br><br>ILCT/MLCT<br>$\pi(\text{phenoxido}) + 4d_{zx}(\text{Rh}) \rightarrow \pi^*(\text{azo1} + \text{azo2})$                           |      |          |
| 337<br>nm               | $S_{15}$<br>$w = 0.63$<br>3.3706 (0.098)<br>367.84 nm<br><br>LLCT/MLCT<br>$\pi(\text{pyrrolido} + \text{P}) + 4d_{zx}(\text{Rh}) \rightarrow$<br>$4d_{yz}(\text{Rh}) + \pi^*(\text{PPh}_3)$ |      |          |
| 301<br>nm               | $S_{50}$<br>$w = 0.36$<br>4.085 (0.032)<br>303.48 nm<br><br>LLCT/MLCT<br>$\pi(\text{PPh}_3) + 4d_z^2(\text{Rh}) \rightarrow \pi^*(\text{PPh}_3)$                                            |      |          |

**Fig. S11** Natural transition orbitals (NTOs) for complex **1** illustrating the nature of singlet excited states in the absorption bands in the range 300–700 nm. For each state, the respective number of the state, transition energy (eV), and the oscillator strength (in parentheses) are listed. Shown are only occupied (holes) and unoccupied (electrons) NTO pairs that contribute more than 35% to each excited state.



| $\lambda_{\text{expt}}$ |                                                                                                                                                                                                                      | Hole | Electron |
|-------------------------|----------------------------------------------------------------------------------------------------------------------------------------------------------------------------------------------------------------------|------|----------|
| 692,<br>654<br>nm       | $S_1$<br>$w = 0.97$<br>1.8857 (0.9459)<br>657.49 nm<br><br>ILCT<br>$\pi(\text{phenoxido} + \text{pyrrolido} + \text{Ph}) + 2p(\text{NMe}_2)$<br>$\rightarrow \pi^*(\text{azo1} + \text{azo2} + \text{pyrrolido})$    |      |          |
| 455<br>nm               | $S_7$<br>$w = 0.73$<br>2.8670 (0.1424)<br>432.45 nm<br><br>LMCT/LLCT<br>$\pi(\text{pyrrolido} + \text{phenoxido} + \text{azo1} + \text{azo2}) +$<br>$2p(\text{NMe}_2) \rightarrow 4d_z^2(\text{Rh}) + 3p(\text{Cl})$ |      |          |
| 335<br>nm               | $S_{25}$<br>$w = 0.86$<br>3.5776 (0.085)<br>346.55 nm<br><br>LMCT<br>$\pi(\text{pyrrolido} + \text{azo2} + \text{phenoxido} + \text{azo1}) +$<br>$2p(\text{NMe}_2) \rightarrow 4d_{x^2-y^2}(\text{Rh})$              |      |          |

**Fig. S12** Natural transition orbitals (NTOs) for complex **2a** illustrating the nature of singlet excited states in the absorption bands in the range 300–700 nm. For each state, the respective number of the state, transition energy (eV), and the oscillator strength (in parentheses) are listed. Shown are only occupied (holes) and unoccupied (electrons) NTO pairs that contribute more than 50% to each excited state.

**Table S10** Coordinates of optimized geometry <sup>11</sup>

| <b>Tag</b> | <b>Symbol</b> | <b>X</b> | <b>Y</b> | <b>Z</b> |
|------------|---------------|----------|----------|----------|
| 1          | Rh            | 25.37605 | 9.277089 | 14.6943  |
| 2          | Br            | 19.47127 | 8.994821 | 18.50335 |
| 3          | Cl            | 27.55451 | 10.03006 | 15.51376 |
| 4          | Br            | 34.56178 | 10.71456 | 11.98104 |
| 5          | P             | 26.01912 | 7.028197 | 15.4966  |
| 6          | P             | 24.90559 | 11.64895 | 14.16024 |
| 7          | N             | 23.58342 | 8.667394 | 14.06395 |
| 8          | N             | 23.41452 | 8.279205 | 12.85571 |
| 9          | C             | 22.57152 | 8.702752 | 15.01971 |
| 10         | N             | 25.73757 | 8.788581 | 12.69444 |
| 11         | N             | 28.76803 | 9.047627 | 11.01415 |
| 12         | O             | 24.26639 | 9.536406 | 16.48239 |
| 13         | C             | 23.01236 | 9.179551 | 16.28707 |
| 14         | C             | 22.06013 | 9.258147 | 17.32616 |
| 15         | H             | 22.37345 | 9.620045 | 18.30033 |
| 16         | C             | 26.974   | 7.913961 | 19.41059 |
| 17         | H             | 26.68022 | 8.655942 | 20.15019 |
| 18         | C             | 25.78843 | 13.62204 | 10.62027 |
| 19         | H             | 25.25603 | 14.19499 | 9.863774 |
| 20         | C             | 21.00198 | 12.9329  | 14.6206  |
| 21         | H             | 20.4361  | 13.50824 | 15.3503  |
| 22         | C             | 27.16827 | 13.45377 | 10.53168 |
| 23         | H             | 27.72002 | 13.89187 | 9.70245  |
| 24         | C             | 21.10295 | 11.6686  | 12.57226 |
| 25         | H             | 20.6161  | 11.25269 | 11.69255 |
| 26         | C             | 20.36858 | 12.41191 | 13.49586 |
| 27         | H             | 19.30493 | 12.57943 | 13.34032 |
| 28         | C             | 32.73685 | 10.1993  | 11.70674 |
| 29         | C             | 29.23392 | 4.777836 | 13.01907 |
| 30         | H             | 30.00994 | 4.258584 | 12.46046 |
| 31         | C             | 25.40101 | 12.43192 | 16.83092 |
| 32         | H             | 25.15741 | 11.40736 | 17.08852 |
| 33         | C             | 30.51284 | 9.90803  | 12.57874 |
| 34         | H             | 29.801   | 9.96647  | 13.39818 |
| 35         | C             | 26.04117 | 15.06526 | 16.16679 |
| 36         | H             | 26.29706 | 16.08875 | 15.90068 |
| 37         | C             | 28.06079 | 4.113288 | 13.36925 |
| 38         | H             | 27.91643 | 3.071602 | 13.08981 |
| 39         | C             | 26.03991 | 14.66608 | 17.50211 |
| 40         | H             | 26.29439 | 15.37803 | 18.28471 |
| 41         | C             | 27.83904 | 12.72291 | 11.51068 |
| 42         | H             | 28.91602 | 12.58447 | 11.44873 |
| 43         | C             | 32.33286 | 9.750854 | 10.45226 |
| 44         | H             | 33.04319 | 9.692657 | 9.63284  |
| 45         | C             | 25.7218  | 14.15306 | 15.16384 |
| 46         | H             | 25.73425 | 14.47797 | 14.12736 |
| 47         | C             | 20.32181 | 8.405727 | 15.83017 |
| 48         | H             | 19.28798 | 8.11401  | 15.67782 |
| 49         | C             | 22.4616  | 11.44743 | 12.77361 |
| 50         | H             | 23.01408 | 10.85896 | 12.04605 |
| 51         | C             | 27.90378 | 6.929909 | 19.73987 |
| 52         | H             | 28.33582 | 6.89747  | 20.73804 |
| 53         | C             | 23.0124  | 4.631036 | 17.0202  |

|     |   |          |          |          |
|-----|---|----------|----------|----------|
| 54  | H | 22.66594 | 4.319634 | 18.00331 |
| 55  | C | 25.71832 | 13.35077 | 17.8294  |
| 56  | H | 25.72455 | 13.03014 | 18.86908 |
| 57  | C | 27.235   | 6.116971 | 14.45513 |
| 58  | C | 31.00563 | 9.37883  | 10.2652  |
| 59  | H | 30.66117 | 9.024476 | 9.296585 |
| 60  | C | 27.06626 | 4.775611 | 14.08734 |
| 61  | H | 26.16778 | 4.234722 | 14.36713 |
| 62  | C | 26.0911  | 8.251126 | 10.50362 |
| 63  | H | 26.6267  | 8.115774 | 9.573944 |
| 64  | C | 30.08451 | 9.451375 | 11.31853 |
| 65  | C | 20.75425 | 8.876464 | 17.079   |
| 66  | C | 27.73498 | 6.03504  | 17.50307 |
| 67  | H | 28.04619 | 5.298925 | 16.76758 |
| 68  | C | 24.55664 | 8.343754 | 12.13118 |
| 69  | C | 28.28316 | 5.990872 | 18.78305 |
| 70  | H | 29.01251 | 5.2217   | 19.02848 |
| 71  | C | 24.76032 | 8.004812 | 10.76778 |
| 72  | H | 24.00013 | 7.629153 | 10.09346 |
| 73  | C | 27.13693 | 12.15568 | 12.57044 |
| 74  | H | 27.66636 | 11.58459 | 13.32765 |
| 75  | C | 22.36544 | 12.72149 | 14.82148 |
| 76  | H | 22.84594 | 13.14113 | 15.70025 |
| 77  | C | 26.79879 | 7.022352 | 17.16825 |
| 78  | C | 26.42395 | 7.966472 | 18.13156 |
| 79  | H | 25.70595 | 8.739162 | 17.87844 |
| 80  | C | 31.83595 | 10.28046 | 12.77114 |
| 81  | H | 32.16858 | 10.63275 | 13.74355 |
| 82  | C | 23.9044  | 5.449835 | 14.51379 |
| 83  | H | 24.23653 | 5.762193 | 13.52712 |
| 84  | C | 26.67516 | 8.73633  | 11.71374 |
| 85  | C | 28.41705 | 6.780207 | 14.09837 |
| 86  | H | 28.55864 | 7.819514 | 14.38015 |
| 87  | C | 29.40956 | 6.110143 | 13.38847 |
| 88  | H | 30.32113 | 6.637863 | 13.11756 |
| 89  | C | 21.24314 | 8.321814 | 14.80079 |
| 90  | H | 20.94963 | 7.962963 | 13.81847 |
| 91  | C | 24.11824 | 5.47409  | 16.91777 |
| 92  | H | 24.62242 | 5.802209 | 17.82181 |
| 93  | C | 24.58021 | 5.88823  | 15.66301 |
| 94  | C | 25.74858 | 12.32319 | 12.66684 |
| 95  | C | 25.39626 | 12.82944 | 15.48935 |
| 96  | C | 23.1117  | 11.98113 | 13.89692 |
| 97  | N | 27.96342 | 9.12492  | 11.98865 |
| 98  | C | 22.35583 | 4.1912   | 15.87434 |
| 99  | H | 21.49332 | 3.533264 | 15.95647 |
| 100 | C | 25.08008 | 13.06455 | 11.68384 |
| 101 | H | 24.00833 | 13.22467 | 11.74551 |
| 102 | C | 22.80554 | 4.603355 | 14.62015 |
| 103 | H | 22.29657 | 4.268855 | 13.71854 |

**Table S11** Coordinates of optimized geometry **<sup>1</sup>2a**

| <b>Tag</b> | <b>Symbol</b> | <b>X</b> | <b>Y</b> | <b>Z</b> |
|------------|---------------|----------|----------|----------|
| 1          | Rh            | 25.37793 | 9.261184 | 14.657   |
| 2          | Br            | 19.61816 | 8.985557 | 18.68911 |
| 3          | Cl            | 27.59446 | 9.988047 | 15.40824 |
| 4          | P             | 26.02494 | 6.996192 | 15.40271 |
| 5          | P             | 24.90747 | 11.63791 | 14.17032 |
| 6          | N             | 23.55685 | 8.672913 | 14.08839 |
| 7          | N             | 23.34071 | 8.299518 | 12.88041 |
| 8          | C             | 22.58055 | 8.706515 | 15.08255 |
| 9          | N             | 25.66119 | 8.791473 | 12.63804 |
| 10         | N             | 28.62119 | 9.042308 | 10.83646 |
| 11         | O             | 24.33819 | 9.512116 | 16.48741 |
| 12         | C             | 23.07207 | 9.166859 | 16.33666 |
| 13         | C             | 22.16211 | 9.2422   | 17.4116  |
| 14         | H             | 22.5156  | 9.591617 | 18.37665 |
| 15         | C             | 27.117   | 7.813235 | 19.29622 |
| 16         | H             | 26.85933 | 8.550958 | 20.05344 |
| 17         | C             | 25.67251 | 13.66502 | 10.63347 |
| 18         | H             | 25.11871 | 14.2643  | 9.913506 |
| 19         | C             | 21.03912 | 12.96859 | 14.78255 |
| 20         | H             | 20.50695 | 13.54554 | 15.53585 |
| 21         | C             | 27.04233 | 13.46647 | 10.47628 |
| 22         | H             | 27.56446 | 13.90681 | 9.629122 |
| 23         | C             | 21.05088 | 11.7166  | 12.72427 |
| 24         | H             | 20.52754 | 11.31179 | 11.86046 |
| 25         | C             | 20.35946 | 12.46309 | 13.67798 |
| 26         | H             | 19.29299 | 12.64448 | 13.56191 |
| 27         | C             | 32.6778  | 10.17416 | 11.31666 |
| 28         | C             | 29.13324 | 4.745375 | 12.79138 |
| 29         | H             | 29.88346 | 4.226319 | 12.19817 |
| 30         | C             | 25.49762 | 12.38866 | 16.83108 |
| 31         | H             | 25.24461 | 11.36527 | 17.08505 |
| 32         | C             | 30.46034 | 9.875461 | 12.29886 |
| 33         | H             | 29.79969 | 9.934718 | 13.16018 |
| 34         | C             | 26.16062 | 15.0179  | 16.17389 |
| 35         | H             | 26.42463 | 16.04005 | 15.9101  |
| 36         | C             | 27.97708 | 4.080318 | 13.19361 |
| 37         | H             | 27.82066 | 3.038483 | 12.921   |
| 38         | C             | 26.1922  | 14.60557 | 17.5048  |
| 39         | H             | 26.48039 | 15.30567 | 18.28653 |
| 40         | C             | 27.74042 | 12.70001 | 11.40769 |
| 41         | H             | 28.80854 | 12.53249 | 11.28978 |
| 42         | C             | 32.14941 | 9.729622 | 10.08082 |
| 43         | H             | 32.78142 | 9.669013 | 9.201353 |
| 44         | C             | 25.7966  | 14.12098 | 15.17212 |
| 45         | H             | 25.78362 | 14.45604 | 14.13887 |
| 46         | C             | 20.36066 | 8.418196 | 15.97779 |
| 47         | H             | 19.31969 | 8.135274 | 15.86112 |
| 48         | C             | 22.41285 | 11.47703 | 12.87559 |
| 49         | H             | 22.93221 | 10.88631 | 12.12575 |
| 50         | C             | 28.03686 | 6.807448 | 19.58545 |
| 51         | H             | 28.49725 | 6.753368 | 20.57004 |
| 52         | C             | 23.0392  | 4.609181 | 16.98548 |
| 53         | H             | 22.71593 | 4.291788 | 17.97457 |

|     |   |          |          |          |
|-----|---|----------|----------|----------|
| 54  | C | 25.85916 | 13.29215 | 17.82854 |
| 55  | H | 25.89058 | 12.96076 | 18.86448 |
| 56  | C | 27.19817 | 6.085267 | 14.31194 |
| 57  | C | 30.81813 | 9.366096 | 9.968591 |
| 58  | H | 30.42269 | 9.025622 | 9.013987 |
| 59  | C | 27.01445 | 4.743272 | 13.9532  |
| 60  | H | 26.12784 | 4.20331  | 14.27049 |
| 61  | C | 25.92279 | 8.274877 | 10.43073 |
| 62  | H | 26.4226  | 8.145937 | 9.480488 |
| 63  | C | 29.94585 | 9.427943 | 11.06534 |
| 64  | C | 20.8434  | 8.872441 | 17.21171 |
| 65  | C | 27.78381 | 5.945358 | 17.34365 |
| 66  | H | 28.05906 | 5.21346  | 16.58971 |
| 67  | C | 24.44968 | 8.361703 | 12.11535 |
| 68  | C | 28.36912 | 5.873957 | 18.60586 |
| 69  | H | 29.09013 | 5.087514 | 18.81967 |
| 70  | C | 24.60122 | 8.036801 | 10.74162 |
| 71  | H | 23.81307 | 7.675447 | 10.09178 |
| 72  | C | 27.07549 | 12.12816 | 12.48895 |
| 73  | H | 27.62553 | 11.52686 | 13.20693 |
| 74  | C | 22.40597 | 12.73821 | 14.9334  |
| 75  | H | 22.92274 | 13.14527 | 15.79735 |
| 76  | C | 26.85663 | 6.953685 | 17.04943 |
| 77  | C | 26.52965 | 7.892523 | 18.03505 |
| 78  | H | 25.81829 | 8.681077 | 17.81294 |
| 79  | C | 31.78648 | 10.23997 | 12.42078 |
| 80  | H | 32.13853 | 10.58293 | 13.3881  |
| 81  | C | 23.87131 | 5.445026 | 14.46409 |
| 82  | H | 24.17926 | 5.765378 | 13.47216 |
| 83  | C | 26.55813 | 8.742535 | 11.62437 |
| 84  | C | 28.36302 | 6.748625 | 13.90328 |
| 85  | H | 28.51618 | 7.78918  | 14.17412 |
| 86  | C | 29.32374 | 6.078312 | 13.15068 |
| 87  | H | 30.21958 | 6.608529 | 12.83559 |
| 88  | C | 21.24299 | 8.338028 | 14.91201 |
| 89  | H | 20.90905 | 7.990782 | 13.93843 |
| 90  | C | 24.15047 | 5.442129 | 16.86125 |
| 91  | H | 24.68214 | 5.756337 | 17.75449 |
| 92  | C | 24.58241 | 5.864653 | 15.59871 |
| 93  | C | 25.69788 | 12.32562 | 12.6541  |
| 94  | C | 25.45882 | 12.79976 | 15.49401 |
| 95  | C | 23.10909 | 11.99455 | 13.97832 |
| 96  | N | 27.8619  | 9.118381 | 11.85069 |
| 97  | C | 22.34693 | 4.188294 | 15.85359 |
| 98  | H | 21.47947 | 3.539155 | 15.95256 |
| 99  | C | 25.00185 | 13.1017  | 11.71806 |
| 100 | H | 23.93756 | 13.2821  | 11.83206 |
| 101 | C | 22.76688 | 4.608821 | 14.5919  |
| 102 | H | 22.22953 | 4.289969 | 13.7011  |
| 103 | N | 34.00406 | 10.52586 | 11.44812 |
| 104 | C | 34.86931 | 10.54606 | 10.28064 |
| 105 | H | 35.87859 | 10.82965 | 10.58584 |
| 106 | H | 34.9294  | 9.555376 | 9.809949 |
| 107 | H | 34.52621 | 11.26626 | 9.52106  |
| 108 | C | 34.49219 | 11.08031 | 12.70117 |
| 109 | H | 34.35557 | 10.37503 | 13.5317  |
| 110 | H | 35.56131 | 11.2829  | 12.61079 |
| 111 | H | 33.98627 | 12.02221 | 12.96405 |

**Table S12** Coordinates of optimized geometry **12b**

| <b>Tag</b> | <b>Symbol</b> | <b>X</b> | <b>Y</b> | <b>Z</b> |
|------------|---------------|----------|----------|----------|
| 1          | Rh            | 25.38295 | 9.234904 | 14.71026 |
| 2          | Cl            | 27.55235 | 10.03251 | 15.52336 |
| 3          | Br            | 34.5167  | 10.85916 | 11.95978 |
| 4          | P             | 26.07855 | 6.998787 | 15.49681 |
| 5          | P             | 24.86736 | 11.59211 | 14.1686  |
| 6          | N             | 23.59312 | 8.589703 | 14.1008  |
| 7          | N             | 23.42051 | 8.197122 | 12.89297 |
| 8          | C             | 22.6053  | 8.60674  | 15.06797 |
| 9          | N             | 25.73546 | 8.748393 | 12.70878 |
| 10         | N             | 28.75722 | 9.058135 | 11.00369 |
| 11         | O             | 24.29179 | 9.486345 | 16.50842 |
| 12         | C             | 23.04119 | 9.09659  | 16.33437 |
| 13         | C             | 22.11265 | 9.158596 | 17.38274 |
| 14         | H             | 22.46947 | 9.544332 | 18.33085 |
| 15         | C             | 26.99507 | 7.878021 | 19.4213  |
| 16         | H             | 26.67892 | 8.607002 | 20.16483 |
| 17         | C             | 25.70279 | 13.56175 | 10.61411 |
| 18         | H             | 25.15766 | 14.11968 | 9.855346 |
| 19         | C             | 20.9592  | 12.88118 | 14.60037 |
| 20         | H             | 20.39428 | 13.48201 | 15.31024 |
| 21         | C             | 27.08501 | 13.41669 | 10.52148 |
| 22         | H             | 27.62613 | 13.85804 | 9.686961 |
| 23         | C             | 21.06023 | 11.55726 | 12.59039 |
| 24         | H             | 20.57414 | 11.11608 | 11.72269 |
| 25         | C             | 20.32609 | 12.32925 | 13.4902  |
| 26         | H             | 19.26343 | 12.4964  | 13.32647 |
| 27         | C             | 32.70188 | 10.30047 | 11.68962 |
| 28         | C             | 29.36183 | 4.850354 | 13.01625 |
| 29         | H             | 30.15267 | 4.355909 | 12.45579 |
| 30         | C             | 25.36692 | 12.39789 | 16.83178 |
| 31         | H             | 25.14496 | 11.36938 | 17.09385 |
| 32         | C             | 30.48647 | 9.9579   | 12.56508 |
| 33         | H             | 29.77556 | 10.00085 | 13.38625 |
| 34         | C             | 25.95263 | 15.04036 | 16.15221 |
| 35         | H             | 26.18814 | 16.06714 | 15.87973 |
| 36         | C             | 28.20043 | 4.156384 | 13.34778 |
| 37         | H             | 28.07976 | 3.11614  | 13.05203 |
| 38         | C             | 25.97018 | 14.64662 | 17.48906 |
| 39         | H             | 26.21931 | 15.36611 | 18.26661 |
| 40         | C             | 27.77168 | 12.70302 | 11.50205 |
| 41         | H             | 28.85019 | 12.57978 | 11.43572 |
| 42         | C             | 32.30555 | 9.841768 | 10.43659 |
| 43         | H             | 33.01524 | 9.799291 | 9.615511 |
| 44         | C             | 25.64209 | 14.11794 | 15.15574 |
| 45         | H             | 25.6407  | 14.43824 | 14.11766 |
| 46         | C             | 20.37686 | 8.26415  | 15.92385 |
| 47         | H             | 19.35583 | 7.944938 | 15.75055 |
| 48         | C             | 22.4186  | 11.34096 | 12.79923 |
| 49         | H             | 22.97122 | 10.73195 | 12.0891  |
| 50         | C             | 27.95286 | 6.919849 | 19.74666 |
| 51         | H             | 28.38395 | 6.893739 | 20.74554 |
| 52         | C             | 23.16871 | 4.460416 | 16.98721 |
| 53         | H             | 22.84691 | 4.106833 | 17.96468 |
| 54         | C             | 25.67586 | 13.32672 | 17.82385 |

|     |   |          |          |          |
|-----|---|----------|----------|----------|
| 55  | H | 25.69907 | 13.00991 | 18.86461 |
| 56  | C | 27.32383 | 6.126784 | 14.45474 |
| 57  | C | 30.98682 | 9.439025 | 10.25237 |
| 58  | H | 30.64925 | 9.07637  | 9.284268 |
| 59  | C | 27.18669 | 4.787566 | 14.06713 |
| 60  | H | 26.29742 | 4.2241   | 14.33126 |
| 61  | C | 26.08512 | 8.213616 | 10.51752 |
| 62  | H | 26.61363 | 8.084468 | 9.582765 |
| 63  | C | 30.06424 | 9.490488 | 11.30634 |
| 64  | C | 20.78144 | 8.742724 | 17.2074  |
| 65  | C | 27.81683 | 6.036738 | 17.50285 |
| 66  | H | 28.15238 | 5.316276 | 16.76248 |
| 67  | C | 24.56159 | 8.283961 | 12.15767 |
| 68  | C | 28.36255 | 5.999393 | 18.78419 |
| 69  | H | 29.11452 | 5.251061 | 19.02601 |
| 70  | C | 24.75863 | 7.945509 | 10.79477 |
| 71  | H | 23.99906 | 7.555504 | 10.12776 |
| 72  | C | 27.08318 | 12.13024 | 12.56773 |
| 73  | H | 27.62459 | 11.56986 | 13.32437 |
| 74  | C | 22.32185 | 12.67232 | 14.80973 |
| 75  | H | 22.80249 | 13.11598 | 15.67652 |
| 76  | C | 26.85263 | 6.998014 | 17.17204 |
| 77  | C | 26.44704 | 7.923439 | 18.14099 |
| 78  | H | 25.70781 | 8.676728 | 17.88889 |
| 79  | C | 31.80133 | 10.36122 | 12.755   |
| 80  | H | 32.12696 | 10.72187 | 13.72683 |
| 81  | C | 24.00316 | 5.379889 | 14.49635 |
| 82  | H | 24.31278 | 5.730789 | 13.51558 |
| 83  | C | 26.67232 | 8.710443 | 11.71769 |
| 84  | C | 28.49386 | 6.819883 | 14.11592 |
| 85  | H | 28.6099  | 7.858654 | 14.41074 |
| 86  | C | 29.50596 | 6.180846 | 13.40509 |
| 87  | H | 30.40671 | 6.732716 | 13.14645 |
| 88  | C | 21.27635 | 8.200354 | 14.88397 |
| 89  | H | 20.96697 | 7.836009 | 13.90834 |
| 90  | C | 24.24164 | 5.346427 | 16.89739 |
| 91  | H | 24.74424 | 5.666947 | 17.805   |
| 92  | C | 24.67504 | 5.811313 | 15.65033 |
| 93  | C | 25.69278 | 12.27517 | 12.66873 |
| 94  | C | 25.34377 | 12.78986 | 15.48881 |
| 95  | C | 23.06833 | 11.90555 | 13.90735 |
| 96  | N | 27.95138 | 9.121406 | 11.98136 |
| 97  | C | 22.51575 | 4.028535 | 15.83619 |
| 98  | H | 21.67963 | 3.335944 | 15.90804 |
| 99  | C | 25.00803 | 12.99859 | 11.68365 |
| 100 | H | 23.93358 | 13.13883 | 11.74701 |
| 101 | C | 22.93643 | 4.491734 | 14.58992 |
| 102 | H | 22.43022 | 4.164652 | 13.68406 |
| 103 | N | 19.8789  | 8.78831  | 18.25201 |
| 104 | C | 18.47017 | 8.511436 | 18.01891 |
| 105 | H | 17.93133 | 8.581214 | 18.96629 |
| 106 | H | 18.01358 | 9.222535 | 17.31217 |
| 107 | H | 18.32095 | 7.496351 | 17.6292  |
| 108 | C | 20.26938 | 9.396257 | 19.51278 |
| 109 | H | 19.44131 | 9.32132  | 20.22093 |
| 110 | H | 21.13201 | 8.878093 | 19.95161 |
| 111 | H | 20.53172 | 10.46039 | 19.3986  |

**Table S13** Coordinates of optimized geometry  $21^{+}$ 

| Tag | Symbol | X        | Y        | Z        |
|-----|--------|----------|----------|----------|
| 1   | Rh     | 25.36357 | 9.267638 | 14.68435 |
| 2   | Br     | 19.33967 | 8.880835 | 18.26668 |
| 3   | Cl     | 27.51435 | 10.01626 | 15.50486 |
| 4   | Br     | 34.58316 | 10.7295  | 11.87999 |
| 5   | P      | 26.0165  | 7.005772 | 15.51803 |
| 6   | P      | 24.8987  | 11.67044 | 14.16674 |
| 7   | N      | 23.59234 | 8.648344 | 14.0122  |
| 8   | N      | 23.45847 | 8.255971 | 12.76733 |
| 9   | C      | 22.56405 | 8.65809  | 14.89734 |
| 10  | N      | 25.77783 | 8.800532 | 12.70946 |
| 11  | N      | 28.80286 | 9.081409 | 11.06666 |
| 12  | O      | 24.17692 | 9.493397 | 16.4342  |
| 13  | C      | 22.95422 | 9.134955 | 16.20824 |
| 14  | C      | 21.9624  | 9.195279 | 17.22118 |
| 15  | H      | 22.24146 | 9.551548 | 18.20746 |
| 16  | C      | 27.02999 | 7.960476 | 19.39871 |
| 17  | H      | 26.75788 | 8.718201 | 20.13001 |
| 18  | C      | 25.75046 | 13.54182 | 10.56814 |
| 19  | H      | 25.20724 | 14.06163 | 9.782167 |
| 20  | C      | 21.01892 | 12.98528 | 14.69609 |
| 21  | H      | 20.47761 | 13.58194 | 15.42663 |
| 22  | C      | 27.13836 | 13.44162 | 10.51333 |
| 23  | H      | 27.68449 | 13.88071 | 9.681442 |
| 24  | C      | 21.06139 | 11.70424 | 12.65512 |
| 25  | H      | 20.55258 | 11.29797 | 11.78372 |
| 26  | C      | 20.35662 | 12.4666  | 13.58687 |
| 27  | H      | 19.29525 | 12.65708 | 13.44528 |
| 28  | C      | 32.76784 | 10.22032 | 11.65273 |
| 29  | C      | 29.18549 | 4.738927 | 13.00723 |
| 30  | H      | 29.95534 | 4.211093 | 12.44886 |
| 31  | C      | 25.41946 | 12.42013 | 16.8424  |
| 32  | H      | 25.17402 | 11.39771 | 17.10388 |
| 33  | C      | 30.56695 | 9.941277 | 12.58848 |
| 34  | H      | 29.87369 | 10.00449 | 13.42292 |
| 35  | C      | 26.07871 | 15.05028 | 16.18645 |
| 36  | H      | 26.33947 | 16.07322 | 15.92483 |
| 37  | C      | 27.99162 | 4.097222 | 13.32782 |
| 38  | H      | 27.82569 | 3.065922 | 13.02472 |
| 39  | C      | 26.07544 | 14.64578 | 17.51998 |
| 40  | H      | 26.33505 | 15.35281 | 18.30461 |
| 41  | C      | 27.82518 | 12.78719 | 11.53522 |
| 42  | H      | 28.91005 | 12.71578 | 11.50472 |
| 43  | C      | 32.33242 | 9.764681 | 10.40637 |
| 44  | H      | 33.02484 | 9.701766 | 9.572593 |
| 45  | C      | 25.7523  | 14.14518 | 15.17967 |
| 46  | H      | 25.76222 | 14.47636 | 14.14519 |
| 47  | C      | 20.30102 | 8.333451 | 15.63104 |
| 48  | H      | 19.27306 | 8.034991 | 15.45224 |
| 49  | C      | 22.41985 | 11.46303 | 12.83344 |
| 50  | H      | 22.94945 | 10.86795 | 12.09435 |
| 51  | C      | 27.94591 | 6.96491  | 19.73284 |
| 52  | H      | 28.38711 | 6.940213 | 20.72666 |
| 53  | C      | 23.011   | 4.679495 | 17.13524 |
| 54  | H      | 22.68606 | 4.385288 | 18.13065 |
| 55  | C      | 25.74405 | 13.33188 | 17.84407 |



|     |   |          |          |          |
|-----|---|----------|----------|----------|
| 56  | H | 25.74865 | 13.00892 | 18.88266 |
| 57  | C | 27.20839 | 6.093063 | 14.45751 |
| 58  | C | 31.005   | 9.395453 | 10.25236 |
| 59  | H | 30.63506 | 9.036802 | 9.295165 |
| 60  | C | 27.00723 | 4.766272 | 14.05387 |
| 61  | H | 26.0969  | 4.23804  | 14.3183  |
| 62  | C | 26.17827 | 8.273923 | 10.50828 |
| 63  | H | 26.75005 | 8.155884 | 9.598281 |
| 64  | C | 30.10955 | 9.477693 | 11.33445 |
| 65  | C | 20.68109 | 8.803546 | 16.92254 |
| 66  | C | 27.73998 | 6.037467 | 17.51257 |
| 67  | H | 28.0297  | 5.282589 | 16.78746 |
| 68  | C | 24.60709 | 8.342353 | 12.10444 |
| 69  | C | 28.29935 | 6.004345 | 18.78766 |
| 70  | H | 29.01611 | 5.22595  | 19.03898 |
| 71  | C | 24.86246 | 8.012311 | 10.7259  |
| 72  | H | 24.12363 | 7.633064 | 10.03076 |
| 73  | C | 27.131   | 12.22516 | 12.60239 |
| 74  | H | 27.67318 | 11.72006 | 13.3968  |
| 75  | C | 22.38254 | 12.75406 | 14.8741  |
| 76  | H | 22.88643 | 13.18046 | 15.73621 |
| 77  | C | 26.81684 | 7.036289 | 17.17299 |
| 78  | C | 26.46817 | 8.001792 | 18.12506 |
| 79  | H | 25.76537 | 8.78749  | 17.87327 |
| 80  | C | 31.89035 | 10.30981 | 12.74349 |
| 81  | H | 32.25224 | 10.66724 | 13.70313 |
| 82  | C | 23.86051 | 5.436313 | 14.59427 |
| 83  | H | 24.17944 | 5.715713 | 13.59346 |
| 84  | C | 26.73181 | 8.766514 | 11.76607 |
| 85  | C | 28.41268 | 6.734517 | 14.13131 |
| 86  | H | 28.58368 | 7.758796 | 14.45047 |
| 87  | C | 29.39398 | 6.055909 | 13.41484 |
| 88  | H | 30.32868 | 6.55895  | 13.1776  |
| 89  | C | 21.23447 | 8.262331 | 14.63094 |
| 90  | H | 20.97288 | 7.908101 | 13.63895 |
| 91  | C | 24.11864 | 5.514834 | 16.99422 |
| 92  | H | 24.64511 | 5.853666 | 17.8814  |
| 93  | C | 24.56072 | 5.897294 | 15.72099 |
| 94  | C | 25.73273 | 12.32461 | 12.66399 |
| 95  | C | 25.41783 | 12.82238 | 15.50187 |
| 96  | C | 23.10064 | 11.99564 | 13.94007 |
| 97  | N | 28.00547 | 9.160931 | 12.05959 |
| 98  | C | 22.33253 | 4.215843 | 16.01158 |
| 99  | H | 21.47459 | 3.556934 | 16.12392 |
| 100 | C | 25.04796 | 12.99222 | 11.63988 |
| 101 | H | 23.96992 | 13.11009 | 11.67756 |
| 102 | C | 22.76077 | 4.596801 | 14.73968 |
| 103 | H | 22.2392  | 4.235545 | 13.85609 |

**Table S14** Coordinates of optimized geometry **<sup>2</sup>2a<sup>•+</sup>**

| <b>Tag</b> | <b>Symbol</b> | <b>X</b> | <b>Y</b> | <b>Z</b> |
|------------|---------------|----------|----------|----------|
| 1          | Rh            | 25.37012 | 9.250341 | 14.63664 |
| 2          | Br            | 19.47943 | 8.899808 | 18.43957 |
| 3          | Cl            | 27.56649 | 9.969426 | 15.38094 |
| 4          | P             | 26.01919 | 6.977435 | 15.42492 |
| 5          | P             | 24.90301 | 11.65566 | 14.16966 |
| 6          | N             | 23.57002 | 8.652229 | 14.0243  |
| 7          | N             | 23.38685 | 8.272855 | 12.78478 |
| 8          | C             | 22.57592 | 8.666221 | 14.95363 |
| 9          | N             | 25.70534 | 8.794905 | 12.63797 |
| 10         | N             | 28.67502 | 9.063759 | 10.86019 |
| 11         | O             | 24.25621 | 9.478368 | 16.43339 |
| 12         | C             | 23.01832 | 9.130181 | 16.24643 |
| 13         | C             | 22.06508 | 9.193053 | 17.29312 |
| 14         | H             | 22.38166 | 9.541224 | 18.27095 |
| 15         | C             | 27.16883 | 7.876559 | 19.28132 |
| 16         | H             | 26.92617 | 8.628181 | 20.02922 |
| 17         | C             | 25.59658 | 13.61078 | 10.58147 |
| 18         | H             | 25.0231  | 14.1708  | 9.846195 |
| 19         | C             | 21.06839 | 13.02233 | 14.87817 |
| 20         | H             | 20.56686 | 13.61986 | 15.63606 |
| 21         | C             | 26.9738  | 13.46548 | 10.43481 |
| 22         | H             | 27.48109 | 13.90917 | 9.580904 |
| 23         | C             | 21.00576 | 11.75493 | 12.8295  |
| 24         | H             | 20.45428 | 11.35976 | 11.97917 |
| 25         | C             | 20.35196 | 12.52005 | 13.79547 |
| 26         | H             | 19.28776 | 12.72412 | 13.70192 |
| 27         | C             | 32.69123 | 10.22217 | 11.30301 |
| 28         | C             | 29.06241 | 4.670078 | 12.79469 |
| 29         | H             | 29.80192 | 4.133619 | 12.20422 |
| 30         | C             | 25.53098 | 12.37176 | 16.83031 |
| 31         | H             | 25.26801 | 11.3526  | 17.08815 |
| 32         | C             | 30.49045 | 9.91122  | 12.31611 |
| 33         | H             | 29.8324  | 9.96427  | 13.17938 |
| 34         | C             | 26.22783 | 14.99313 | 16.17889 |
| 35         | H             | 26.5019  | 16.01308 | 15.91874 |
| 36         | C             | 27.88887 | 4.032596 | 13.18999 |
| 37         | H             | 27.70866 | 2.996071 | 12.91371 |
| 38         | C             | 26.25897 | 14.5752  | 17.50784 |
| 39         | H             | 26.55858 | 15.2685  | 18.29065 |
| 40         | C             | 27.69962 | 12.75675 | 11.39126 |
| 41         | H             | 28.77652 | 12.64478 | 11.28672 |
| 42         | C             | 32.15895 | 9.756547 | 10.06388 |
| 43         | H             | 32.79106 | 9.692093 | 9.185744 |
| 44         | C             | 25.84786 | 14.10588 | 15.17468 |
| 45         | H             | 25.83115 | 14.4474  | 14.14371 |
| 46         | C             | 20.33541 | 8.354926 | 15.76613 |
| 47         | H             | 19.29961 | 8.065597 | 15.62175 |
| 48         | C             | 22.36715 | 11.49435 | 12.94764 |
| 49         | H             | 22.85704 | 10.89714 | 12.18312 |
| 50         | C             | 28.08489 | 6.868772 | 19.57597 |
| 51         | H             | 28.556   | 6.828062 | 20.55554 |
| 52         | C             | 23.0343  | 4.678141 | 17.12116 |
| 53         | H             | 22.7319  | 4.385989 | 18.12427 |
| 54         | C             | 25.9088  | 13.26556 | 17.82953 |
| 55         | H             | 25.93898 | 12.9317  | 18.86432 |

|     |   |          |          |          |
|-----|---|----------|----------|----------|
| 56  | C | 27.16097 | 6.048683 | 14.32181 |
| 57  | C | 30.84128 | 9.385416 | 9.962862 |
| 58  | H | 30.43966 | 9.032558 | 9.016093 |
| 59  | C | 26.94269 | 4.714122 | 13.95396 |
| 60  | H | 26.04656 | 4.191333 | 14.27237 |
| 61  | C | 26.01767 | 8.285293 | 10.41673 |
| 62  | H | 26.54892 | 8.169019 | 9.482342 |
| 63  | C | 29.96716 | 9.45037  | 11.07558 |
| 64  | C | 20.76791 | 8.814098 | 17.03993 |
| 65  | C | 27.79918 | 5.968513 | 17.3533  |
| 66  | H | 28.05846 | 5.219071 | 16.61118 |
| 67  | C | 24.51541 | 8.355863 | 12.07873 |
| 68  | C | 28.39851 | 5.915625 | 18.60955 |
| 69  | H | 29.11439 | 5.126851 | 18.82966 |
| 70  | C | 24.70974 | 8.034735 | 10.68746 |
| 71  | H | 23.93821 | 7.668813 | 10.02121 |
| 72  | C | 27.05482 | 12.18638 | 12.48486 |
| 73  | H | 27.62644 | 11.63594 | 13.22661 |
| 74  | C | 22.43499 | 12.77125 | 14.9959  |
| 75  | H | 22.98068 | 13.18344 | 15.8392  |
| 76  | C | 26.87531 | 6.978987 | 17.05364 |
| 77  | C | 26.56702 | 7.937324 | 18.02668 |
| 78  | H | 25.86166 | 8.730367 | 17.8058  |
| 79  | C | 31.80424 | 10.28329 | 12.4251  |
| 80  | H | 32.16772 | 10.62937 | 13.38632 |
| 81  | C | 23.82416 | 5.432455 | 14.56047 |
| 82  | H | 24.11936 | 5.71257  | 13.55262 |
| 83  | C | 26.63128 | 8.762794 | 11.65364 |
| 84  | C | 28.34422 | 6.685417 | 13.92049 |
| 85  | H | 28.52742 | 7.717068 | 14.20716 |
| 86  | C | 29.28785 | 5.994916 | 13.1655  |
| 87  | H | 30.20483 | 6.497124 | 12.8654  |
| 88  | C | 21.23517 | 8.282773 | 14.73373 |
| 89  | H | 20.93643 | 7.936333 | 13.74933 |
| 90  | C | 24.14836 | 5.499673 | 16.9524  |
| 91  | H | 24.70258 | 5.829793 | 17.82589 |
| 92  | C | 24.55984 | 5.881134 | 15.66903 |
| 93  | C | 25.6682  | 12.33049 | 12.63851 |
| 94  | C | 25.49365 | 12.78802 | 15.4945  |
| 95  | C | 23.10145 | 12.00905 | 14.02784 |
| 96  | N | 27.90362 | 9.140825 | 11.89512 |
| 97  | C | 22.31903 | 4.227814 | 16.01513 |
| 98  | H | 21.45462 | 3.581471 | 16.14898 |
| 99  | C | 24.94453 | 13.05159 | 11.67965 |
| 100 | H | 23.87503 | 13.19973 | 11.78822 |
| 101 | C | 22.71781 | 4.60698  | 14.73324 |
| 102 | H | 22.1668  | 4.257028 | 13.86299 |
| 103 | N | 33.99147 | 10.59399 | 11.41727 |
| 104 | C | 34.88794 | 10.52604 | 10.26329 |
| 105 | H | 35.88209 | 10.85814 | 10.5628  |
| 106 | H | 34.97065 | 9.499711 | 9.884333 |
| 107 | H | 34.54039 | 11.17642 | 9.450576 |
| 108 | C | 34.52195 | 11.07785 | 12.69242 |
| 109 | H | 34.44063 | 10.31225 | 13.47402 |
| 110 | H | 35.57636 | 11.32534 | 12.56861 |
| 111 | H | 33.99589 | 11.98118 | 13.02542 |
